# Supplementary material for: Computational insight into a mechanistic overview of water exchange kinetics and thermodynamic stabilities of bis and tris-aquated complexes of lanthanides
Source: Royal Society of Chemistry journal article supplement (doi:10.1039/d2ra05810c), 2023-01-01
Supplement: d2ra05810c1.pdf [file d2ra05810c1.pdf]

Electronic Supplementary Material (ESI) for RSC Advances. This journal is © The Royal Society of Chemistry 2022

*Electronic Supporting Information for  
the manuscript*

## **A Computational Insight into Mechanistic Overview of Water-Exchange Kinetics and Thermodynamic Stabilities of Bis and Tris-Aquated Complexes of Lanthanides†**

Niharika Keot<sup>a</sup> and Manabendra Sarma\*<sup>a</sup>

<sup>a</sup>Department of Chemistry, Indian Institute of Technology Guwahati 781039, India

\*Email: msarma@iitg.ac.in

### **Table of Contents**

| <b>List of Tables</b> |                                                                                                                                                                                                                                                                                                        | <b>Page No.</b> |
|-----------------------|--------------------------------------------------------------------------------------------------------------------------------------------------------------------------------------------------------------------------------------------------------------------------------------------------------|-----------------|
| <b>Table S1</b>       | Binding energy values ( $\Delta E_{\text{TOTAL}} = E_{\text{COMPLEX}} - E_{\text{LIGAND}} - E_{\text{Gd(III)}}$ ) and relative binding energy ( $\Delta E_{\text{REL}}$ ) values (in kcal/mol) of the chosen complexes were calculated using TPSSh/6-31G(d,p)/SCRECP level of theory.                  | 5               |
| <b>Table S2</b>       | Binding energy values ( $\Delta E_{\text{TOTAL}} = E_{\text{COMPLEX}} - E_{\text{LIGAND}} - E_{\text{Gd(III)}}$ ) and relative binding energy ( $\Delta E_{\text{REL}}$ ) values (in kcal/mol) of the chosen complexes using different density functionals and basis sets with LCRECP level of theory. | 5               |
| <b>Table S3</b>       | Bond length values of the [Gd(tpaa)(H <sub>2</sub> O) <sub>2</sub> ] complex using LCRECP and SCRECP with 6-31G(d,p) for H, C, N, O, and TPSSh level of theory.                                                                                                                                        | 6               |
| <b>Table S4</b>       | Bond length values of the [Gd(peada)(H <sub>2</sub> O) <sub>2</sub> ] <sup>-</sup> complex using LCRECP and SCRECP with 6-31G(d,p) for H, C, N, O, and TPSSh level of theory.                                                                                                                          | 6               |
| <b>Table S5</b>       | Bond length values of the [Gd(dpaa)(H <sub>2</sub> O) <sub>3</sub> ] complex using LCRECP and SCRECP with 6-31G(d,p) for H, C, N, O, and TPSSh level of theory.                                                                                                                                        | 6               |
| <b>Table S6</b>       | Bond length (Å) values of the [Gd(cbda)(H <sub>2</sub> O) <sub>3</sub> ] complex using LCRECP and SCRECP with 6-31G(d,p) for H, C, N, O, and TPSSh level of theory.                                                                                                                                    | 7               |
| <b>Table S7</b>       | Thermodynamic parameters (kcal/mol, scheme 1) were obtained with different density functionals and basis sets for [Gd(cbda)] and [Gd(dpaa)] complexes.                                                                                                                                                 | 7               |
| <b>Table S8</b>       | Thermodynamic parameters (kcal/mol, scheme S1) were obtained with different density functionals and basis sets for [Gd(peada)] <sup>-</sup> and [Gd(tpaa)] complexes.                                                                                                                                  | 7               |
| <b>Table S9</b>       | Ln-O(w) bond lengths (Å) of [Ln(cbda)(H <sub>2</sub> O) <sub>3</sub> ].6H <sub>2</sub> O complex using SCRECP/TPSSh/6-31G(d,p) level of theory.                                                                                                                                                        | 8               |
| <b>Table S10</b>      | Ln-O(w) bond lengths (Å) of [Ln(peada)(H <sub>2</sub> O) <sub>2</sub> ] <sup>-</sup> .4H <sub>2</sub> O complex using SCRECP/TPSSh/6-31G(d,p) level of theory.                                                                                                                                         | 8               |
| <b>Table S11</b>      | Bond length values of the complex [Gd(cbda)(H <sub>2</sub> O) <sub>3</sub> ].6H <sub>2</sub> O using LCRECP with different density functionals and basis sets.                                                                                                                                         | 8-9             |
| <b>Table S12</b>      | Bond length values of the complex [Gd(peada)(H <sub>2</sub> O) <sub>2</sub> ] <sup>-</sup> .6H <sub>2</sub> O using LCRECP and with different DFT methods and basis sets.                                                                                                                              | 9-10            |

|                  |                                                                                                                                                                                                                                                                                                                                               |       |
|------------------|-----------------------------------------------------------------------------------------------------------------------------------------------------------------------------------------------------------------------------------------------------------------------------------------------------------------------------------------------|-------|
| <b>Table S13</b> | Electron density ( $\rho_{\text{BCP}}$ ), electron localization function (ELF), and Laplacian of electron density ( $\nabla^2\rho$ ) at the Ln-O(w) bond critical points calculated for the $[\text{Ln}(\text{cbda})(\text{H}_2\text{O})_3]\cdot 6\text{H}_2\text{O}$ system (Ln=La-Lu) at the TPSSh/SCRECP/6-31G(d,p) theoretical level.     | 10    |
| <b>Table S14</b> | Electron density ( $\rho_{\text{BCP}}$ ), electron localization function (ELF), and Laplacian of electron density ( $\nabla^2\rho$ ) at the Ln-O(w) bond critical points calculated for the $[\text{Ln}(\text{peada})(\text{H}_2\text{O})_3]^- \cdot 4\text{H}_2\text{O}$ system (Ln=La-Lu) at the TPSSh/SCRECP/6-31G(d,p) theoretical level. | 10    |
| <b>Table S15</b> | Electron density ( $\rho_{\text{BCP}}$ ), electron localization function (ELF), and Laplacian of electron density ( $\nabla^2\rho$ ) at the Ln-O(w) critical points calculated for the $[\text{Gd}(\text{cbda})(\text{H}_2\text{O})_3]\cdot 6\text{H}_2\text{O}$ system at the LCRECP with different density functionals and basis sets.      | 11    |
| <b>Table S16</b> | Electron density ( $\rho_{\text{BCP}}$ ), electron localization function (ELF), and Laplacian of electron density ( $\nabla^2\rho$ ) at the Ln-O(w) critical points calculated for the $[\text{Gd}(\text{peada})(\text{H}_2\text{O})_2]^- \cdot 4\text{H}_2\text{O}$ system at the LCRECP and different density functionals and basis sets.   | 12    |
| <b>Table S17</b> | Calculated Gd-O(w) bond length, electron density ( $\rho$ , au), electron localization function (ELF), and $k_{\text{ex}}^{298}$ value of $[\text{Gd}(\text{cbda})(\text{H}_2\text{O})_3]\cdot 6\text{H}_2\text{O}$ complex using LCRECP and different density functionals and basis sets.                                                    | 16    |
| <b>Table S18</b> | Calculated Gd-O(w) bond length, electron density ( $\rho$ , au), electron localization function (ELF), and $k_{\text{ex}}^{298}$ value of $[\text{Gd}(\text{peada})(\text{H}_2\text{O})_2]^- \cdot 4\text{H}_2\text{O}$ complex using LCRECP and different density functionals and basis sets.                                                | 16-17 |
| <b>Table S19</b> | Activation energy values of $[\text{Gd}(\text{cbda})(\text{H}_2\text{O})_3]\cdot 6\text{H}_2\text{O}$ and $[\text{Gd}(\text{peada})(\text{H}_2\text{O})_2]^- \cdot 4\text{H}_2\text{O}$ complexes calculated using SCRECP/TPSSh/6-31G(d,p) theoretical level.                                                                                 | 17    |
| <b>Table S20</b> | Bonding behavior of the $[\text{Gd}(\text{cbda})(\text{H}_2\text{O})_3]\cdot 6\text{H}_2\text{O}$ and $[\text{Gd}(\text{peada})(\text{H}_2\text{O})_2]^- \cdot 4\text{H}_2\text{O}$ complexes from ETS analysis (in kJ/mol).                                                                                                                  | 17    |
| <b>Table S21</b> | Cartesian coordinates (Å) of $[\text{Gd}(\text{tpaa})(\text{H}_2\text{O})_2]$ complex (without explicit water molecules) optimized at TPSSh/LCRECP/6-31G(d,p), aqueous solution (0 Imaginary Frequency).                                                                                                                                      | 18-19 |
| <b>Table S22</b> | Cartesian coordinates (Å) of $[\text{Gd}(\text{dpaa})(\text{H}_2\text{O})_3]$ complex (without explicit water molecules) optimized at TPSSh/LCRECP/6-31G(d,p), aqueous solution (0 Imaginary Frequency).                                                                                                                                      | 19-20 |
| <b>Table S23</b> | Cartesian coordinates (Å) of $[\text{Gd}(\text{cbda})(\text{H}_2\text{O})_3]\cdot 6\text{H}_2\text{O}$ complex, optimized at TPSSh/LCRECP/6-31G(d,p), aqueous solution (0 Imaginary Frequency).                                                                                                                                               | 20-22 |
| <b>Table S24</b> | Cartesian coordinates (Å) of $[\text{Gd}(\text{cbda})(\text{H}_2\text{O})_3]\cdot 6\text{H}_2\text{O}$ complex, optimized at TPSSh/SCRECP/6-31G(d,p), aqueous solution (0 Imaginary Frequency).                                                                                                                                               | 22-24 |
| <b>Table S25</b> | Cartesian coordinates (Å) of $[\text{Gd}(\text{peada})(\text{H}_2\text{O})_2]^- \cdot 4\text{H}_2\text{O}$ complex, optimized at TPSSh/LCRECP/6-31G(d,p), aqueous solution (0 Imaginary Frequency).                                                                                                                                           | 24-25 |
| <b>Table S26</b> | Cartesian coordinates (Å) of $[\text{Gd}(\text{peada})(\text{H}_2\text{O})_2]^- \cdot 4\text{H}_2\text{O}$ complex, optimized at TPSSh/SCRECP/6-31G(d,p), aqueous solution (0 Imaginary Frequency).                                                                                                                                           | 25-27 |
| <b>Table S27</b> | Cartesian coordinates (Å) of $[\text{Gd}(\text{cbda})(\text{H}_2\text{O})_3]\cdot 6\text{H}_2\text{O}$ complex, corresponding to Gd-O36(w) bond optimized at TPSSh/LCRECP/6-31G(d,p), aqueous solution (1 Imaginary Frequency).                                                                                                               | 27-28 |

|                        |                                                                                                                                                                                                                                                                              |       |
|------------------------|------------------------------------------------------------------------------------------------------------------------------------------------------------------------------------------------------------------------------------------------------------------------------|-------|
| <b>Table S28</b>       | Cartesian coordinates (Å) of [Gd(cbda)(H <sub>2</sub> O) <sub>3</sub> ].6H <sub>2</sub> O complex, corresponding to Gd-O39(w) bond optimized at TPSSh/LCRECP/6-31G(d,p), aqueous solution (1 Imaginary Frequency).                                                           | 28-30 |
| <b>Table S29</b>       | Cartesian coordinates (Å) of [Gd(cbda)(H <sub>2</sub> O) <sub>3</sub> ].6H <sub>2</sub> O complex, corresponding to Gd-O47(w) bond optimized at TPSSh/LCRECP/6-31G(d,p), aqueous solution (1 Imaginary Frequency).                                                           | 30-32 |
| <b>Table S30</b>       | Cartesian coordinates (Å) of [Gd(peada)(H <sub>2</sub> O) <sub>2</sub> ] <sup>-</sup> .4H <sub>2</sub> O complex, corresponding to Gd-O40(w) bond optimized at TPSSh/LCRECP/6-31G(d,p), aqueous solution (1 Imaginary Frequency).                                            | 32-33 |
| <b>Table S31</b>       | Cartesian coordinates (Å) of [Gd(peada)(H <sub>2</sub> O) <sub>2</sub> ] <sup>-</sup> .4H <sub>2</sub> O complex, corresponding to Gd-O43(w) bond optimized at TPSSh/LCRECP/6-31G(d,p), aqueous solution (1 Imaginary Frequency).                                            | 33-35 |
| <b>Table S32</b>       | Cartesian coordinates (Å) of [Gd(cbda)(H <sub>2</sub> O) <sub>3</sub> ].6H <sub>2</sub> O complex, corresponding to Gd-O36(w) bond optimized at TPSSh/SCRECP/6-31G(d,p), aqueous solution (1 Imaginary Frequency).                                                           | 35-36 |
| <b>Table S33</b>       | Cartesian coordinates (Å) of [Gd(cbda)(H <sub>2</sub> O) <sub>3</sub> ].6H <sub>2</sub> O complex, corresponding to Gd-O39(w) bond optimized at TPSSh/SCRECP/6-31G(d,p), aqueous solution (1 Imaginary Frequency).                                                           | 37-38 |
| <b>Table S34</b>       | Cartesian coordinates (Å) of [Gd(cbda)(H <sub>2</sub> O) <sub>3</sub> ].6H <sub>2</sub> O complex, corresponding to Gd-O47(w) bond optimized at TPSSh/SCRECP/6-31G(d,p), aqueous solution (1 Imaginary Frequency).                                                           | 38-40 |
| <b>Table S35</b>       | Cartesian coordinates (Å) of [Gd(peada)(H <sub>2</sub> O) <sub>2</sub> ] <sup>-</sup> .4H <sub>2</sub> O complex, corresponding to Gd-O43(w) bond optimized at TPSSh/SCRECP/6-31G(d,p), aqueous solution (1 Imaginary Frequency).                                            | 40-41 |
| <b>Table S36</b>       | Cartesian coordinates (Å) of [Gd(peada)(H <sub>2</sub> O) <sub>2</sub> ] <sup>-</sup> .4H <sub>2</sub> O complex, corresponding to Gd-O40(w) bond optimized at TPSSh/SCRECP/6-31G(d,p), aqueous solution (1 Imaginary Frequency).                                            | 42-43 |
| <b>Table S37</b>       | Cartesian coordinates (Å) of [Gd(cbda)(H <sub>2</sub> O) <sub>3</sub> ].6H <sub>2</sub> O complex, optimized at TPSSh/SARC-ZORA/6-31G(d,p), aqueous solution (0 Imaginary Frequency).                                                                                        | 43-45 |
| <b>Table S38</b>       | Cartesian coordinates (Å) of [Gd(peada)(H <sub>2</sub> O) <sub>2</sub> ] <sup>-</sup> .4H <sub>2</sub> O complex, optimized at TPSSh/SARC-ZORA/6-31G(d,p), aqueous solution (0 Imaginary Frequency).                                                                         | 45-46 |
| <b>List of Figures</b> |                                                                                                                                                                                                                                                                              |       |
| <b>Figure S1</b>       | Optimized structures of a) [Gd(cbda)(H <sub>2</sub> O) <sub>3</sub> ].6H <sub>2</sub> O and b) [Gd(peada)(H <sub>2</sub> O) <sub>2</sub> ] <sup>-</sup> .4H <sub>2</sub> O complex using LCRECP/TPSSh/6-31G(d,p) level of theory.                                            | 13    |
| <b>Figure S2</b>       | Relaxed potential energy surface scans of the tris-aquated [Gd(cbda)(H <sub>2</sub> O) <sub>3</sub> ].6H <sub>2</sub> O and bis-aquated [Gd(peada)(H <sub>2</sub> O) <sub>2</sub> ] <sup>-</sup> .4H <sub>2</sub> O complex calculated using SCRECP/TPSSh/6-31G(d,p) method. | 13    |
| <b>Figure S3</b>       | Structure of the transition states (TSs) for the three water molecules of [Gd(cbda)(H <sub>2</sub> O) <sub>3</sub> ].6H <sub>2</sub> O using LCRECP; (a) TS of Gd-O36(w), (b)TS of Gd-O39(w), and (c) TS of Gd-O47(w).                                                       | 14    |
| <b>Figure S4</b>       | Structure of the transition states (TSs) for the two water molecules of [Gd(peada)(H <sub>2</sub> O) <sub>2</sub> ] <sup>-</sup> .4H <sub>2</sub> O complex using LCRECP/TPSSh/6-31G(d,p); a) TS of Gd-O40(w) and b)TS of Gd-O43(w).                                         | 14    |

|                  |                                                                                                                                                                                                                                                                                                                                                         |    |
|------------------|---------------------------------------------------------------------------------------------------------------------------------------------------------------------------------------------------------------------------------------------------------------------------------------------------------------------------------------------------------|----|
| <b>Figure S5</b> | IRC plots for the dissociation of a) Gd-O36(w), b) Gd-O39(w), c) Gd-O47(w), bond of the [Gd(cbda)(H <sub>2</sub> O) <sub>3</sub> ].6H <sub>2</sub> O complex (top) and d) Gd-O40(w), e) Gd-O43(w) bond for [Gd(peada)(H <sub>2</sub> O) <sub>2</sub> ].4H <sub>2</sub> O (bottom) complexes respectively using LCRECP/TPSSh/6-31G(d,p) level of theory. | 15 |
|                  | <b>List of Scheme</b>                                                                                                                                                                                                                                                                                                                                   |    |
| <b>Scheme S1</b> | Thermodynamic Cycle for explaining the stabilities of [Gd(peada)] <sup>-</sup> and [Gd(tpaa)] Complexes.                                                                                                                                                                                                                                                | 15 |

**Table S1:** Binding energy values ( $\Delta E_{\text{TOTAL}} = E_{\text{COMPLEX}} - E_{\text{LIGAND}} - E_{\text{Gd(III)}}$ ) and relative binding energy ( $\Delta E_{\text{REL}}$ ) values (in kcal/mol) of the chosen complexes were calculated using TPSSh/6-31G(d,p)/SCRECP level of theory.

| Methods                 | Complex       | $\Delta E_{\text{total(BSSE corrected)}}$ | $\Delta E_{\text{relative}}$ |
|-------------------------|---------------|-------------------------------------------|------------------------------|
| TPSSh/6-31G(d,p)/SCRECP | Gd(III)-peada | -197.13                                   | 0.0                          |
|                         | Gd(III)-tpaa  | -165.73                                   | +31.4                        |
|                         | Gd(III)-cbda  | -166.42                                   | 0.0                          |
|                         | Gd(III)-dpaa  | -165.06                                   | +1.36                        |

**Table S2:** Binding energy values ( $\Delta E_{\text{TOTAL}} = E_{\text{COMPLEX}} - E_{\text{LIGAND}} - E_{\text{Gd(III)}}$ ) and relative binding energy ( $\Delta E_{\text{REL}}$ ) values (in kcal/mol) of the chosen complexes using different density functionals and basis sets with LCRECP level of theory.

| Methods                                  | Complex       | $\Delta E_{\text{total(BSSE corrected)}}$ | $\Delta E_{\text{relative}}$ |
|------------------------------------------|---------------|-------------------------------------------|------------------------------|
| TPSSh/6-31G(d,p)                         | Gd(III)-peada | -157.86                                   | 0.00                         |
|                                          | Gd(III)-tpaa  | -127.51                                   | +30.35                       |
|                                          | Gd(III)-cbda  | -129.26                                   | 0.00                         |
|                                          | Gd(III)-dpaa  | -127.76                                   | +1.5                         |
| TPSSh/6-31+G(d,p)                        | Gd(III)-peada | -113.61                                   | 0.0                          |
|                                          | Gd(III)-tpaa  | -93.67                                    | +19.94                       |
|                                          | Gd(III)-cbda  | -89.39                                    | 0.0                          |
|                                          | Gd(III)-dpaa  | -87.59                                    | +1.8                         |
| TPSSh/def2-TZVP<br>(Single Point Energy) | Gd(III)-peada | -126.79                                   | 0.0                          |
|                                          | Gd(III)-tpaa  | -101.32                                   | +25.47                       |
|                                          | Gd(III)-cbda  | -100.25                                   | 0.00                         |
|                                          | Gd(III)-dpaa  | -98.53                                    | +1.72                        |
| B3LYP/6-31G(d,p)                         | Gd(III)-peada | -155.43                                   | 0.0                          |
|                                          | Gd(III)-tpaa  | -114.76                                   | +40.67                       |
|                                          | Gd(III)-cbda  | -118.68                                   | 0.0                          |
|                                          | Gd(III)-dpaa  | -117.39                                   | +1.29                        |
| B3LYP-D3/6-31G(d,p)                      | Gd(III)-peada | -162.74                                   | 0.0                          |
|                                          | Gd(III)-tpaa  | -138.78                                   | +23.96                       |
|                                          | Gd(III)-cbda  | -140.69                                   | 0.0                          |
|                                          | Gd(III)-dpaa  | -139.29                                   | +1.4                         |
| B3LYP-D3/6-31+G(d,p)                     | Gd(III)-peada | -128.03                                   | 0.0                          |
|                                          | Gd(III)-tpaa  | -107.31                                   | +20.72                       |
|                                          | Gd(III)-cbda  | -111.49                                   | 0.0                          |
|                                          | Gd(III)-dpaa  | -109.89                                   | +1.6                         |
| $\omega$ B97XD/6-31G(d,p)                | Gd(III)-peada | -159.45                                   | 0.0                          |
|                                          | Gd(III)-tpaa  | -132.04                                   | +27.41                       |
|                                          | Gd(III)-cbda  | -134.87                                   | 0.0                          |
|                                          | Gd(III)-dpaa  | -133.28                                   | +1.59                        |

**Table S3:** Bond length values of the [Gd(tpaa)(H<sub>2</sub>O)<sub>2</sub>] complex using LCRECP and SCRECP with 6-31G(d,p) for H, C, N, O, and TPSSh level of theory.

| Complex | Core-model | Gd-O48(W) | Gd-O51(W) | Gd-N11 | Gd-N9 | Gd-N21 | Gd-N37 | Gd-O25 | Gd-O27 | Gd-O40 |
|---------|------------|-----------|-----------|--------|-------|--------|--------|--------|--------|--------|
| Gd-tpaa | Large core | 2.774     | 2.571     | 2.824  | 2.616 | 2.614  | 2.692  | 2.351  | 2.417  | 2.399  |
| Gd-tpaa | Small core | 3.72      | 2.46      | 2.72   | 2.50  | 2.52   | 2.60   | 2.27   | 2.39   | 2.34   |

**Table S4:** Bond length values of the [Gd(peada)(H<sub>2</sub>O)<sub>2</sub>]<sup>-</sup> complex using LCRECP and SCRECP with 6-31G(d,p) for H, C, N, O, and TPSSh level of theory.

| Complex  | Core-model | Gd-O40(w) | Gd-O43(w) | Gd-N1 | Gd-N2 | Gd-N23 | Gd-O11 | Gd-O12 | Gd-O17 | Gd-O29 |
|----------|------------|-----------|-----------|-------|-------|--------|--------|--------|--------|--------|
| Gd-peada | Large core | 3.36      | 2.54      | 2.65  | 2.62  | 2.56   | 2.34   | 2.33   | 2.36   | 2.42   |
| Gd-peada | Small core | 3.68      | 2.47      | 2.59  | 2.55  | 2.49   | 2.29   | 2.27   | 2.31   | 2.37   |

**Table S5:** Bond length values of the [Gd(dpaa)(H<sub>2</sub>O)<sub>3</sub>] complex using LCRECP and SCRECP with 6-31G(d,p) for H, C, N, O, and TPSSh level of theory.

| Complex | Core-model | Gd-O36(w) | Gd-O39(w) | Gd-O43(w) | Gd-N1 | Gd-N9 | Gd-N15 | Gd-O7 | Gd-O12 | Gd-O14 |
|---------|------------|-----------|-----------|-----------|-------|-------|--------|-------|--------|--------|
| Gd-dpaa | Large core | 2.60      | 2.59      | 2.54      | 2.74  | 2.61  | 2.59   | 2.36  | 2.41   | 2.42   |
| Gd-dpaa | Small core | 2.48      | 2.52      | 2.55      | 2.66  | 2.53  | 2.54   | 2.28  | 2.38   | 2.34   |

**Table S6:** Bond length (Å) values of the [Gd(cbda)(H<sub>2</sub>O)<sub>3</sub>] complex using LCRECP and SCRECP with 6-31G(d,p) for H, C, N, O, and TPSSh level of theory.

| Complex | Core-model | Gd-O36(w) | Gd-O39(w) | Gd-O47(w) | Gd-N1 | Gd-N9 | Gd-N15 | Gd-O7 | Gd-O12 | Gd-O14 |
|---------|------------|-----------|-----------|-----------|-------|-------|--------|-------|--------|--------|
| Gd-cbda | Large core | 2.60      | 2.59      | 2.54      | 2.76  | 2.61  | 2.59   | 2.35  | 2.41   | 2.43   |
| Gd-cbda | Small core | 2.48      | 2.53      | 2.55      | 2.68  | 2.52  | 2.54   | 2.28  | 2.38   | 2.34   |

**Table S7:** Thermodynamic parameters (kcal/mol, scheme 1) were obtained with different density functionals and basis sets for [Gd(cbda)] and [Gd(dpaa)] complexes.

| Methods                          | $\Delta G^a$ (g) | $\Delta G^a$ (sol) [Gd(cbd a)] | $\Delta G^b$ (sol) [Gd(dpaa)] | $\Delta G$ (aq) <sup>c(calcd)</sup> | $\Delta G$ (aq) <sup>d(exp)</sup> |
|----------------------------------|------------------|--------------------------------|-------------------------------|-------------------------------------|-----------------------------------|
| B3LYP/6-31G(d,p)/LCRECP          | -6.27            | -84.72                         | -88.48                        | -1.89                               | -5.48                             |
| B3LYP-D3/6-31G(d,p)/LCRECP       | -3.5             | -85.45                         | -87.89                        | -0.43                               | -5.48                             |
| B3LYP-D3/6-31+G(d,p)/LCRECP      | -1.25            | -98.312                        | -101.08                       | -10.29                              | -5.48                             |
| M06/6-31G(d,p)/LCRECP            | -3.76            | -88.48                         | -90.99                        | -1.25                               | -5.48                             |
| TPSSh/6-31G(d,p)/LCRECP          | -3.72            | -83.54                         | -85.45                        | -1.08                               | -5.48                             |
| TPSSh/6-31+G(d,p)/LCRECP         | -4.60            | -93.34                         | -94.13                        | -7.60                               | -5.48                             |
| $\omega$ B97XD/6-31G(d,p)/LCRECP | -4.4             | -90.75                         | -92.51                        | -11.47                              | -5.48                             |
| B3LYP/6-31G(d,p)/SCRECP          | -6.27            | -75.30                         | -75.30                        | -6.27                               | -5.48                             |
| TPSSh/6-31G(d,p)/SCRECP          | -3.83            | -69.72                         | -70.97                        | -1.88                               | -5.48                             |

**Table S8:** Thermodynamic parameters (kcal/mol, scheme S1) were obtained with different density functionals and basis sets for [Gd(peada)]<sup>-</sup> and [Gd(tpaa)] complexes.

| Methods                          | $\Delta G^a$ (g) | $\Delta G^a$ (sol) [Gd(peada)] <sup>-</sup> | $\Delta G^b$ (sol) [Gd(tpaa)] | $\Delta G$ (aq) <sup>e(calcd)</sup> | $\Delta G$ (aq) <sup>d(ex p)</sup> |
|----------------------------------|------------------|---------------------------------------------|-------------------------------|-------------------------------------|------------------------------------|
| B3LYP/6-31G(d,p)/LCRECP          | -220.17          | -91.87                                      | -68.13                        | -11.70                              | -9.24                              |
| B3LYP-D3/6-31G(d,p)/LCRECP       | -227.79          | -100.72                                     | -79.86                        | -15.95                              | -9.24                              |
| B3LYP-D3/6-31+G(d,p)/LCRECP      | -222.92          | -111.84                                     | -90.21                        | -8.40                               | -9.24                              |
| M06/6-31G(d,p)/LCRECP            | -226.49          | -102.96                                     | -79.33                        | -18.49                              | -9.24                              |
| TPSSh/6-31G(d,p)/LCRECP          | -222.29          | -99.37                                      | -76.51                        | -11.52                              | -9.24                              |
| TPSSh/6-31+G(d,p)/LCRECP         | -218.44          | -107.97                                     | -85.96                        | -6.26                               | -9.24                              |
| $\omega$ B97XD/6-31G(d,p)/LCRECP | -226.59          | -104.63                                     | -82.83                        | -12.84                              | -9.24                              |
| B3LYP/6-31G(d,p)/SCRECP          | -220.17          | -91.87                                      | -68.13                        | -11.70                              | -9.24                              |
| TPSSh/6-31G(d,p)/SCRECP          | -219.55          | -89.19                                      | -65.03                        | 10.09                               | -9.24                              |

$\Delta G^a_{(g)}$  = Change in Gibbs free energy value in gas phase along with BSSE correction using counterpoise method.

$\Delta G^a_{(sol)}$  = Calculated in solvent phase with the structure optimized in the gas phase.

$\Delta G^c_{(aq)} = \Delta G_{(g)} + \Delta G_{sol}[Gd(cbda)] + \Delta G_{sol}[(dpaa^{3-})] - \Delta G_{sol}[(cbda^{3-})] - \Delta G_{sol}[Gd(dpaa)]$

$\Delta G^e_{(aq)} = \Delta G_{(g)} + \Delta G_{sol}[Gd(peada)] + \Delta G_{sol}[(tpaa^{3-})] - \Delta G_{sol}[(peada^{4-})] - \Delta G_{sol}[Gd(tpaa)]$

$\Delta G_{aq}^{d(exp)} = -RT \ln K$ , where K is the equilibrium constant. The values of stability constant ( $\log K_{GdL}$ ) were mentioned in earlier literature.<sup>1,2</sup>

**Table S9:** Ln-O(w) bond lengths (Å) of [Ln(cbda)(H<sub>2</sub>O)<sub>3</sub>].6H<sub>2</sub>O complex using SCRECP/TPSSh/6-31G(d,p) level of theory.

| Metal | Ln-O36(w) | Ln-O39(w) | Ln-O47(w) | Ln-N15 | Ln-N1 | Ln-N9 | Ln-O12 | Ln-O14 | Ln-O7 |
|-------|-----------|-----------|-----------|--------|-------|-------|--------|--------|-------|
| La    | 2.572     | 2.556     | 2.484     | 2.756  | 2.904 | 2.723 | 2.515  | 2.553  | 2.403 |
| Gd    | 2.453     | 2.433     | 2.364     | 2.628  | 2.800 | 2.643 | 2.420  | 2.473  | 2.295 |
| Lu    | 2.389     | 2.361     | 2.293     | 2.574  | 2.795 | 2.619 | 2.370  | 2.411  | 2.233 |

**Table S10:** Ln-O(w) bond lengths (Å) of [Ln(peada)(H<sub>2</sub>O)<sub>2</sub>].4H<sub>2</sub>O complex using SCRECP/TPSSh/6-31G(d,p) level of theory.

| Metal | Ln-O40(w) | Ln-O43(w) | Ln-N1 | Ln-N2 | Ln-N23 | Ln-O11 | Ln-O12 | Ln-O17 | Ln-O29 |
|-------|-----------|-----------|-------|-------|--------|--------|--------|--------|--------|
| La    | 2.707     | 2.612     | 2.796 | 2.827 | 2.705  | 2.445  | 2.399  | 2.438  | 2.535  |
| Gd    | 2.621     | 2.506     | 2.654 | 2.671 | 2.535  | 2.306  | 2.301  | 2.338  | 2.403  |
| Lu    | 2.580     | 2.446     | 2.610 | 2.624 | 2.467  | 2.248  | 2.243  | 2.273  | 2.324  |

**Table S11:** Bond length values of the complex [Gd(cbda)(H<sub>2</sub>O)<sub>3</sub>].6H<sub>2</sub>O using LCRECP with different density functionals and basis sets.

| Metal | Method               | Gd-O36(w) | Gd-O39(w) | Gd-O47(w) | Gd-N15 | Gd-N1 | Gd-N9 | Gd-O12 | Gd-O14 | Gd-O7 |
|-------|----------------------|-----------|-----------|-----------|--------|-------|-------|--------|--------|-------|
| La    | TPSSh/6-31G(d,p)     | 2.618     | 2.572     | 2.555     | 2.794  | 2.944 | 2.779 | 2.592  | 2.604  | 2.473 |
|       | TPSSh/6-31+G(d,p)    | 2.661     | 2.604     | 2.584     | 2.804  | 2.936 | 2.765 | 2.582  | 2.606  | 2.474 |
|       | B3LYP/6-31G(d,p)     | 2.636     | 2.582     | 2.573     | 2.863  | 3.010 | 2.835 | 2.582  | 2.607  | 2.476 |
|       | B3LYP-D3/6-31G(d,p)  | 2.625     | 2.571     | 2.547     | 2.801  | 2.964 | 2.785 | 2.617  | 2.607  | 2.482 |
|       | B3LYP-D3/6-31+G(d,p) | 2.676     | 2.670     | 2.572     | 2.812  | 2.943 | 2.755 | 2.579  | 2.603  | 2.482 |
|       | ωB97XD/              | 2.611     | 2.620     | 2.538     | 2.786  | 2.923 | 2.746 | 2.570  | 2.600  | 2.481 |



|           |                             |       |       |       |       |       |       |       |       |       |
|-----------|-----------------------------|-------|-------|-------|-------|-------|-------|-------|-------|-------|
|           | <b>6-31G(d,p)</b>           |       |       |       |       |       |       |       |       |       |
| <b>Gd</b> | <b>TPSSh/6-31G(d,p)</b>     | 2.527 | 2.455 | 2.421 | 2.687 | 2.871 | 2.703 | 2.498 | 2.514 | 2.351 |
|           | <b>TPSSh/6-31+G(d,p)</b>    | 2.562 | 2.489 | 2.448 | 2.678 | 2.839 | 2.687 | 2.495 | 2.526 | 2.349 |
|           | <b>B3LYP/6-31G(d,p)</b>     | 2.545 | 2.470 | 2.431 | 2.730 | 2.966 | 2.745 | 2.499 | 2.516 | 2.353 |
|           | <b>B3LYP-D3/6-31G(d,p)</b>  | 2.496 | 2.485 | 2.405 | 2.708 | 2.89  | 2.702 | 2.467 | 2.518 | 2.370 |
|           | <b>B3LYP-D3/6-31+G(d,p)</b> | 2.527 | 2.492 | 2.430 | 2.701 | 2.864 | 2.692 | 2.482 | 2.528 | 2.362 |
|           | <b>ωB97XD/6-31G(d,p)</b>    | 2.507 | 2.491 | 2.416 | 2.686 | 2.866 | 2.689 | 2.467 | 2.513 | 2.360 |
| <b>Lu</b> | <b>TPSSh/6-31G(d,p)</b>     | 2.433 | 2.395 | 2.320 | 2.624 | 2.836 | 2.650 | 2.407 | 2.434 | 2.265 |
|           | <b>TPSSh/6-31+G(d,p)</b>    | 2.461 | 2.433 | 2.340 | 2.599 | 2.796 | 2.637 | 2.404 | 2.444 | 2.259 |
|           | <b>B3LYP/6-31G(d,p)</b>     | 2.464 | 2.377 | 2.329 | 2.690 | 2.995 | 2.712 | 2.421 | 2.416 | 2.255 |
|           | <b>B3LYP-D3/6-31G(d,p)</b>  | 2.438 | 2.412 | 2.316 | 2.643 | 2.884 | 2.666 | 2.407 | 2.426 | 2.268 |
|           | <b>B3LYP-D3/6-31+G(d,p)</b> | 2.465 | 2.458 | 2.348 | 2.612 | 2.833 | 2.650 | 2.408 | 2.434 | 2.261 |
|           | <b>ωB97XD/6-31G(d,p)</b>    | 2.433 | 2.410 | 2.315 | 2.623 | 2.850 | 2.653 | 2.408 | 2.425 | 2.264 |

**Table S12:** Bond length values of the complex  $[\text{Gd}(\text{peada})(\text{H}_2\text{O})_2] \cdot 6\text{H}_2\text{O}$  using LCRECP and with different DFT methods and basis sets.

| Metal     | Method                      | Gd-O40(w) | Gd-O43(w) | Gd-N1 | Gd-N2 | Gd-N23 | Gd-O11 | Gd-O12 | Gd-O17 | Gd-O29 |
|-----------|-----------------------------|-----------|-----------|-------|-------|--------|--------|--------|--------|--------|
| <b>La</b> | <b>TPSSh/6-31G(d,p)</b>     | 2.721     | 2.658     | 2.832 | 2.858 | 2.740  | 2.505  | 2.472  | 2.509  | 2.588  |
|           | <b>TPSSh/6-31+G(d,p)</b>    | 2.854     | 2.692     | 2.836 | 2.859 | 2.761  | 2.530  | 2.474  | 2.503  | 2.625  |
|           | <b>B3LYP/6-31G(d,p)</b>     | 2.734     | 2.691     | 2.888 | 2.930 | 2.768  | 2.509  | 2.482  | 2.512  | 2.592  |
|           | <b>B3LYP-D3/6-31G(d,p)</b>  | 2.743     | 2.642     | 2.856 | 2.866 | 2.752  | 2.510  | 2.479  | 2.527  | 2.616  |
|           | <b>B3LYP-D3/6-31+G(d,p)</b> | 2.852     | 2.693     | 2.871 | 2.879 | 2.773  | 2.537  | 2.482  | 2.513  | 2.621  |
|           | <b>ωB97XD/6-31G(d,p)</b>    | 2.732     | 2.631     | 2.846 | 2.861 | 2.744  | 2.508  | 2.476  | 2.525  | 2.606  |
| <b>Gd</b> | <b>TPSSh/6-31G(d,p)</b>     | 2.627     | 2.541     | 2.723 | 2.743 | 2.598  | 2.395  | 2.370  | 2.385  | 2.450  |

|    |                          |       |       |       |       |       |       |       |       |       |
|----|--------------------------|-------|-------|-------|-------|-------|-------|-------|-------|-------|
|    | TPSSh/<br>6-31+G(d,p)    | 2.709 | 2.578 | 2.718 | 2.732 | 2.591 | 2.404 | 2.368 | 2.381 | 2.458 |
|    | B3LYP/<br>6-31G(d,p)     | 2.650 | 2.572 | 2.77  | 2.80  | 2.618 | 2.405 | 2.378 | 2.389 | 2.452 |
|    | B3LYP-D3/<br>6-31G(d,p)  | 2.588 | 2.531 | 2.747 | 2.761 | 2.604 | 2.399 | 2.383 | 2.395 | 2.442 |
|    | B3LYP-D3/<br>6-31+G(d,p) | 2.65  | 2.55  | 2.750 | 2.751 | 2.601 | 2.413 | 2.384 | 2.390 | 2.454 |
|    | ωB97XD/<br>6-31G(d,p)    | 2.60  | 2.542 | 2.739 | 2.753 | 2.595 | 2.396 | 2.377 | 2.386 | 2.435 |
| Lu | TPSSh/6-<br>31G(d,p)     | 2.603 | 2.481 | 2.656 | 2.688 | 2.505 | 2.267 | 2.284 | 2.305 | 2.356 |
|    | TPSSh/<br>6-31+G(d,p)    | 2.716 | 2.528 | 2.644 | 2.671 | 2.493 | 2.267 | 2.277 | 2.295 | 2.356 |
|    | B3LYP/<br>6-31G(d,p)     | 2.648 | 2.516 | 2.717 | 2.775 | 2.523 | 2.263 | 2.286 | 2.296 | 2.351 |
|    | B3LYP-D3/<br>6-31G(d,p)  | 2.591 | 2.492 | 2.684 | 2.665 | 2.499 | 2.280 | 2.291 | 2.312 | 2.340 |
|    | B3LYP-D3/<br>6-31+G(d,p) | 2.685 | 2.546 | 2.672 | 2.680 | 2.496 | 2.273 | 2.285 | 2.295 | 2.349 |
|    | ωB97XD/<br>6-31G(d,p)    | 2.584 | 2.482 | 2.674 | 2.677 | 2.499 | 2.274 | 2.290 | 2.302 | 2.337 |

**Table S13:** Electron density ( $\rho_{\text{BCP}}$ ), electron localization function (ELF), and Laplacian of electron density ( $\nabla^2\rho$ ) at the Ln-O(w) bond critical points calculated for the  $[\text{Ln}(\text{cbda})(\text{H}_2\text{O})_3]\cdot 6\text{H}_2\text{O}$  system (Ln = La-Lu) at the TPSSh/SCRECP/6-31G(d,p) theoretical level.

| Metal | $\rho_{\text{BCP}}$ |           |           | ELF       |           |           | $\nabla^2\rho$ |           |           |
|-------|---------------------|-----------|-----------|-----------|-----------|-----------|----------------|-----------|-----------|
|       | Ln-O36(w)           | Ln-O39(w) | Ln-O47(w) | Ln-O36(w) | Ln-O39(w) | Ln-O47(w) | Ln-O36(w)      | Ln-O39(w) | Ln-O47(w) |
| La    | 0.04034             | 0.04213   | 0.04822   | 0.12274   | 0.12952   | 0.13703   | 0.1511         | 0.1563    | 0.1888    |
| Gd    | 0.04338             | 0.04532   | 0.05207   | 0.101     | 0.10404   | 0.108     | 0.1948         | 0.2048    | 0.2641    |
| Lu    | 0.04398             | 0.04567   | 0.05103   | 0.081     | 0.0901    | 0.09554   | 0.2074         | 0.2239    | 0.2730    |

**Table S14:** Electron density ( $\rho_{\text{BCP}}$ ), electron localization function (ELF), and Laplacian of electron density ( $\nabla^2\rho$ ) at the Ln-O(w) bond critical points calculated for the  $[\text{Ln}(\text{peada})(\text{H}_2\text{O})_3]\cdot 4\text{H}_2\text{O}$  system (Ln = La-Lu) at the TPSSh/SCRECP/6-31G(d,p) theoretical level.

| Metal | $\rho_{\text{BCP}}$ |           | ELF       |           | $\nabla^2\rho$ |           |
|-------|---------------------|-----------|-----------|-----------|----------------|-----------|
|       | Ln-O40(w)           | Ln-O43(w) | Ln-O40(w) | Ln-O43(w) | Ln-O40(w)      | Ln-O43(w) |
| La    | 0.03021             | 0.03602   | 0.10764   | 0.11747   | 0.1071         | 0.1363    |
| Gd    | 0.03595             | 0.03893   | 0.09598   | 0.09986   | 0.1229         | 0.1687    |
| Lu    | 0.02705             | 0.03623   | 0.06207   | 0.07502   | 0.1153         | 0.1754    |

**Table S15:** Electron density ( $\rho_{\text{BCP}}$ ), electron localization function (ELF), and Laplacian of electron density ( $\nabla^2\rho$ ) at the Ln-O(w) critical points calculated for the  $[\text{Gd}(\text{cbda})(\text{H}_2\text{O})_3]\cdot 6\text{H}_2\text{O}$  system at the LCRECP with different density functionals and basis sets.

| Metal | Method                    | $\rho_{\text{BCP}}$ |           |           | ELF       |           |           | $\nabla^2\rho$ |           |           |
|-------|---------------------------|---------------------|-----------|-----------|-----------|-----------|-----------|----------------|-----------|-----------|
|       |                           | Gd-O36(w)           | Gd-O39(w) | Gd-O47(w) | Gd-O36(w) | Gd-O39(w) | Gd-O47(w) | Gd-O36(w)      | Gd-O39(w) | Gd-O47(w) |
| La    | TPSSh/6-31G(d,p)          | 0.03471             | 0.03892   | 0.03875   | 0.09891   | 0.11222   | 0.10378   | 0.1376         | 0.1536    | 0.1624    |
|       | TPSSh/6-31+G(d,p)         | 0.0311              | 0.0357    | 0.0358    | 0.0904    | 0.1049    | 0.0969    | 0.1224         | 0.1402    | 0.1497    |
|       | B3LYP/6-31G(d,p)          | 0.0330              | 0.0375    | 0.0371    | 0.0935    | 0.1065    | 0.1004    | 0.1314         | 0.1502    | 0.1546    |
|       | B3LYP-D3/6-31G(d,p)       | 0.0339              | 0.0381    | 0.0394    | 0.0953    | 0.1080    | 0.1044    | 0.1360         | 0.1470    | 0.1663    |
|       | B3LYP-D3/6-31+G(d,p)      | 0.0297              | 0.0307    | 0.0372    | 0.0853    | 0.0921    | 0.1031    | 0.1176         | 0.1183    | 0.1537    |
|       | $\omega$ B97XD/6-31G(d,p) | 0.0345              | 0.0349    | 0.0404    | 0.0934    | 0.0965    | 0.1057    | 0.1419         | 0.1378    | 0.1715    |
| Gd    | TPSSh/6-31G(d,p)          | 0.03755             | 0.04105   | 0.04296   | 0.09674   | 0.10054   | 0.1002    | 0.1450         | 0.1764    | 0.1953    |
|       | TPSSh/6-31+G(d,p)         | 0.0342              | 0.0376    | 0.0393    | 0.0939    | 0.1009    | 0.1012    | 0.1303         | 0.1588    | 0.1799    |
|       | B3LYP/6-31G(d,p)          | 0.0355              | 0.0394    | 0.0410    | 0.0952    | 0.1031    | 0.0979    | 0.1379         | 0.1686    | 0.1890    |
|       | B3LYP-D3/6-31G(d,p)       | 0.0378              | 0.04181   | 0.0450    | 0.0978    | 0.10985   | 0.1094    | 0.1587         | 0.1784    | 0.2035    |
|       | B3LYP-D3/6-31+G(d,p)      | 0.0340              | 0.0346    | 0.0419    | 0.0913    | 0.0928    | 0.1047    | 0.1443         | 0.1434    | 0.1882    |
|       | $\omega$ B97XD/6-31G(d,p) | 0.0357              | 0.0364    | 0.0433    | 0.0921    | 0.0927    | 0.1025    | 0.1553         | 0.1569    | 0.1993    |

|           |                                  |        |             |             |             |             |        |        |        |        |
|-----------|----------------------------------|--------|-------------|-------------|-------------|-------------|--------|--------|--------|--------|
| <b>Lu</b> | <b>TPSSh/<br/>6-31G(d,p)</b>     | 0.0373 | 0.0405<br>3 | 0.047<br>08 | 0.09<br>593 | 0.101<br>27 | 0.1091 | 0.1592 | 0.1777 | 0.2209 |
|           | <b>TPSSh/<br/>6-31+G(d,p)</b>    | 0.0345 | 0.0367      | 0.043<br>8  | 0.09<br>04  | 0.095<br>3  | 0.1049 | 0.1456 | 0.1573 | 0.2018 |
|           | <b>B3LYP/<br/>6-31G(d,p)</b>     | 0.0345 | 0.0419      | 0.044<br>7  | 0.09<br>02  | 0.103<br>8  | 0.1008 | 0.1453 | 0.1860 | 0.2150 |
|           | <b>B3LYP-D3/<br/>6-31G(d,p)</b>  | 0.0365 | 0.0387      | 0.047<br>4  | 0.09<br>38  | 0.097<br>6  | 0.1096 | 0.1566 | 0.1690 | 0.2231 |
|           | <b>B3LYP-D3/<br/>6-31+G(d,p)</b> | 0.0338 | 0.0343      | 0.043<br>5  | 0.08<br>81  | 0.089<br>7  | 0.1042 | 0.1436 | 0.1462 | 0.2012 |
|           | <b>ωB97XD/<br/>6-31G(d,p)</b>    | 0.0366 | 0.0385      | 0.046<br>9  | 0.09<br>05  | 0.093<br>7  | 0.1049 | 0.1605 | 0.1717 | 0.2261 |

**Table S16:** Electron density ( $\rho_{\text{BCP}}$ ), electron localization function (ELF), and Laplacian of electron density ( $\nabla^2\rho$ ) at the Ln-O(w) critical points calculated for the  $[\text{Gd}(\text{peada})(\text{H}_2\text{O})_2]^- \cdot 4\text{H}_2\text{O}$  system at the LCRECP and different density functionals and basis sets.

| Metal | Method                    | $\rho_{\text{BCP}}$ |           | ELF       |           | $\nabla^2\rho$ |           |
|-------|---------------------------|---------------------|-----------|-----------|-----------|----------------|-----------|
|       |                           | Ln-O40(w)           | Ln-O43(w) | Ln-O40(w) | Ln-O43(w) | Ln-O40(w)      | Ln-O43(w) |
| La    | TPSSh/6-31G(d,p)          | 0.0294              | 0.0323    | 0.0923    | 0.0944    | 0.1058         | 0.1243    |
|       | TPSSh/6-31+G(d,p)         | 0.0220              | 0.0295    | 0.0728    | 0.0879    | 0.0850         | 0.1130    |
|       | B3LYP/6-31G(d,p)          | 0.0283              | 0.0298    | 0.0882    | 0.0875    | 0.1025         | 0.1141    |
|       | B3LYP-D3/6-31G(d,p)       | 0.0278              | 0.0322    | 0.0869    | 0.0890    | 0.1002         | 0.1305    |
|       | B3LYP-D3/6-31+G(d,p)      | 0.0216              | 0.0289    | 0.0704    | 0.0842    | 0.0751         | 0.1129    |
|       | $\omega$ B97XD/6-31G(d,p) | 0.0282              | 0.0329    | 0.0845    | 0.0883    | 0.1043         | 0.1357    |
| Gd    | TPSSh/6-31G(d,p)          | 0.0342              | 0.0364    | 0.0940    | 0.0989    | 0.1106         | 0.1402    |
|       | TPSSh/6-31+G(d,p)         | 0.0310              | 0.0350    | 0.0926    | 0.0976    | 0.1030         | 0.1252    |
|       | B3LYP/6-31G(d,p)          | 0.0305              | 0.0349    | 0.0910    | 0.0985    | 0.1036         | 0.1284    |
|       | B3LYP-D3/6-31G(d,p)       | 0.0350              | 0.0398    | 0.0959    | 0.1006    | 0.1233         | 0.1449    |
|       | B3LYP-D3/6-31+G(d,p)      | 0.0300              | 0.0335    | 0.0908    | 0.0943    | 0.1018         | 0.1337    |
|       | $\omega$ B97XD/6-31G(d,p) | 0.0339              | 0.0411    | 0.0976    | 0.0986    | 0.1185         | 0.1418    |
| Lu    | TPSSh/6-31G(d,p)          | 0.0298              | 0.0334    | 0.0748    | 0.086     | 0.0987         | 0.1389    |
|       | TPSSh/6-31+G(d,p)         | 0.0276              | 0.0296    | 0.0587    | 0.0786    | 0.0728         | 0.1203    |
|       | B3LYP/6-31G(d,p)          | 0.0236              | 0.0305    | 0.0678    | 0.0806    | 0.0874         | 0.1253    |
|       | B3LYP-D3/6-31G(d,p)       | 0.0266              | 0.0320    | 0.0745    | 0.0821    | 0.1021         | 0.1349    |
|       | B3LYP-D3/6-31+G(d,p)      | 0.0212              | 0.0280    | 0.0607    | 0.0741    | 0.0786         | 0.1146    |
|       | $\omega$ B97XD/6-31G(d,p) | 0.0268              | 0.0325    | 0.0724    | 0.0807    | 0.1053         | 0.1400    |

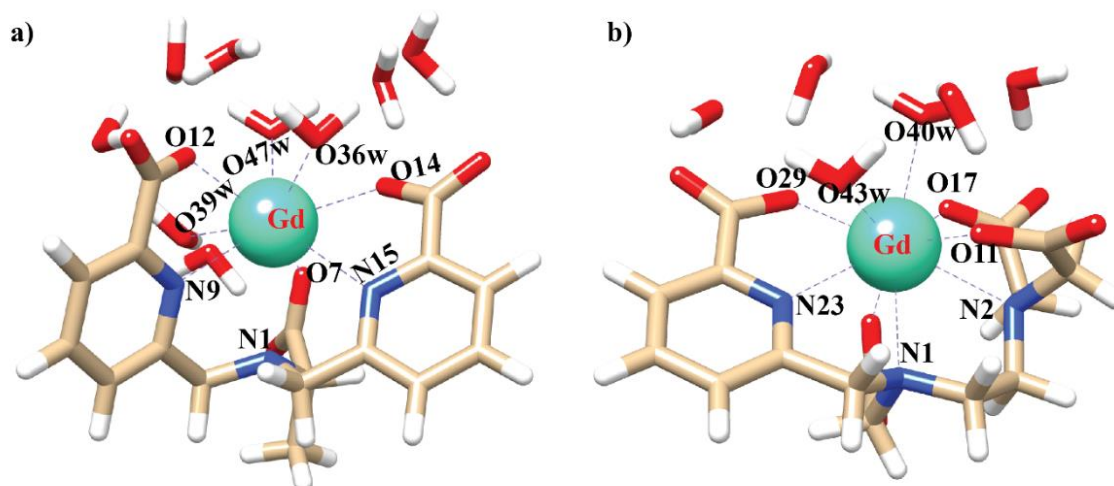

**Figure S1:** Optimized structures of a)  $[\text{Gd}(\text{cbda})(\text{H}_2\text{O})_3] \cdot 6\text{H}_2\text{O}$  and b)  $[\text{Gd}(\text{peada})(\text{H}_2\text{O})_2] \cdot 4\text{H}_2\text{O}$  complex using LCRECP/TPSSH/6-31G(d,p) level of theory.

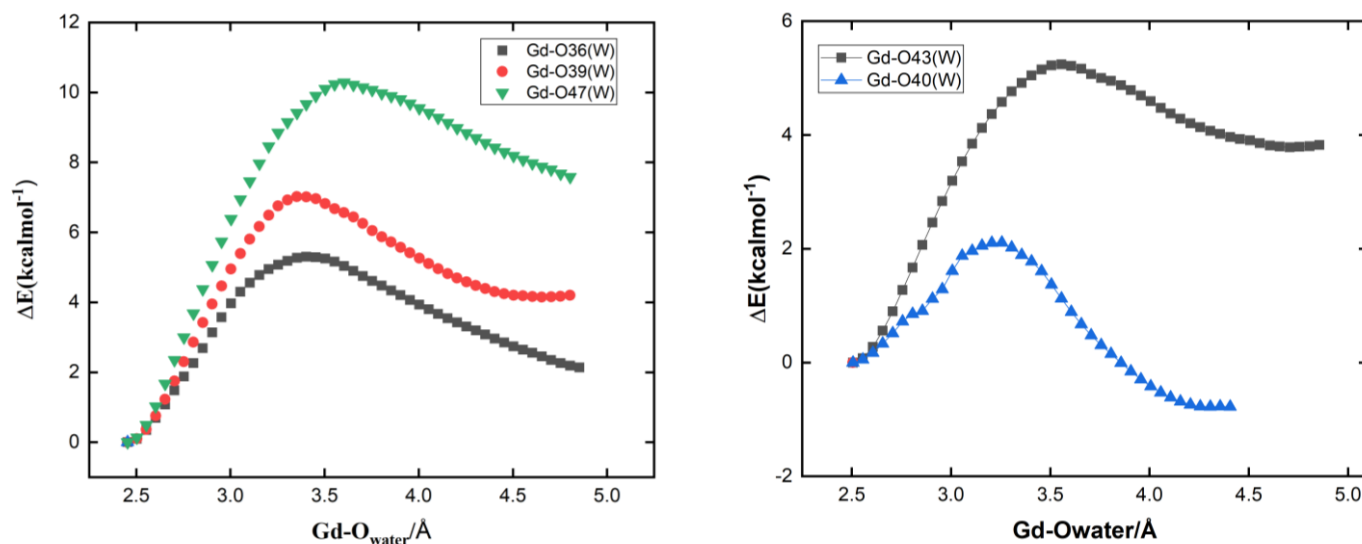

**Figure S2:** Relaxed potential energy surface scans of the tris-aquated  $[\text{Gd}(\text{cbda})(\text{H}_2\text{O})_3] \cdot 6\text{H}_2\text{O}$  and bis-aquated  $[\text{Gd}(\text{peada})(\text{H}_2\text{O})_2] \cdot 4\text{H}_2\text{O}$  complex calculated using SCRECP/TPSSH/6-31G(d,p) method.

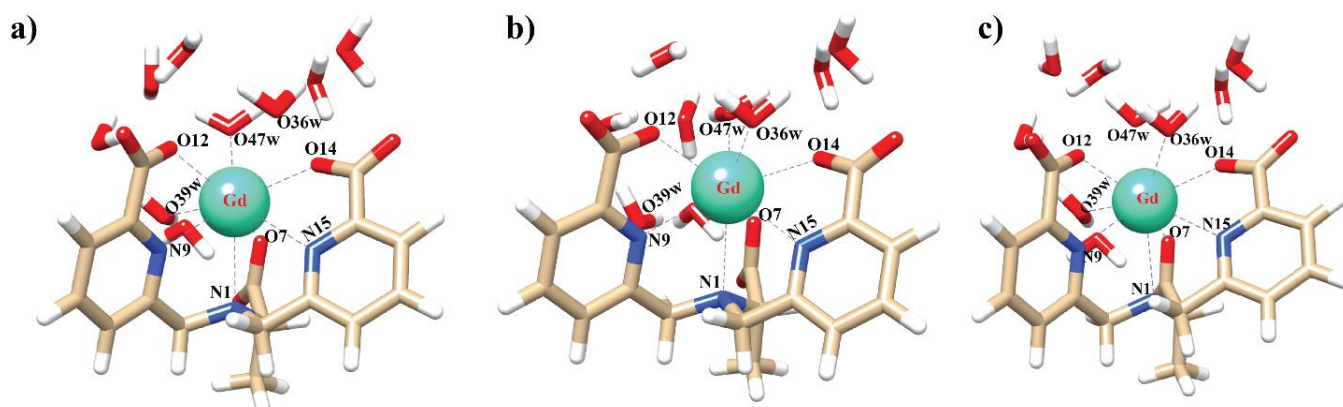

**Figure S3:** Structure of the transition states (TSs) for the three water molecules of  $[\text{Gd}(\text{cbda})(\text{H}_2\text{O})_3] \cdot 6\text{H}_2\text{O}$  using LCRECP; (a) TS of Gd-O36(w), (b) TS of Gd-O39(w), and (c) TS of Gd-O47(w).

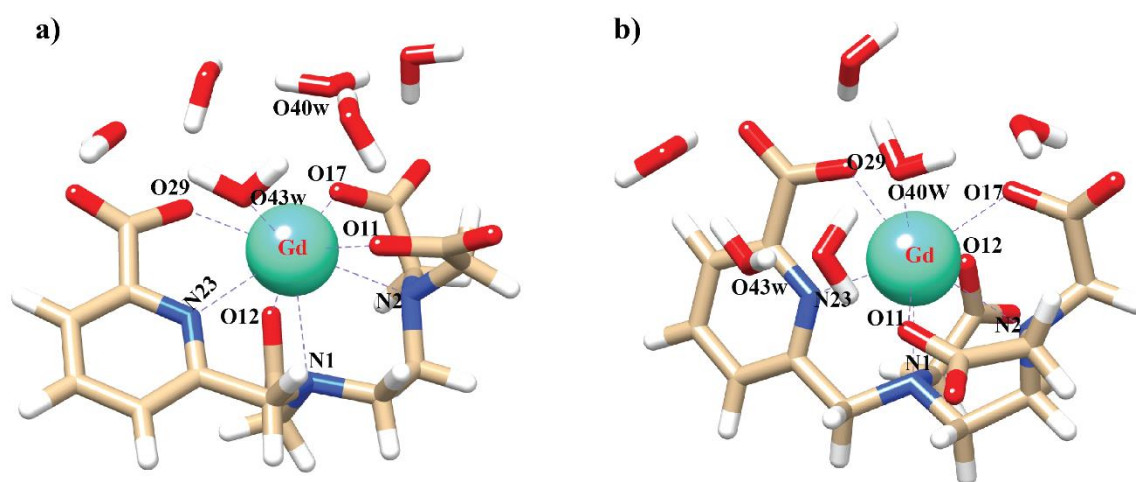

**Figure S4:** Structure of the transition states (TSs) for the two water molecules of  $[\text{Gd}(\text{peada})(\text{H}_2\text{O})_2] \cdot 4\text{H}_2\text{O}$  complex using LCRECP; a) TS of Gd-O40(w) and b) TS of Gd-O43(w).

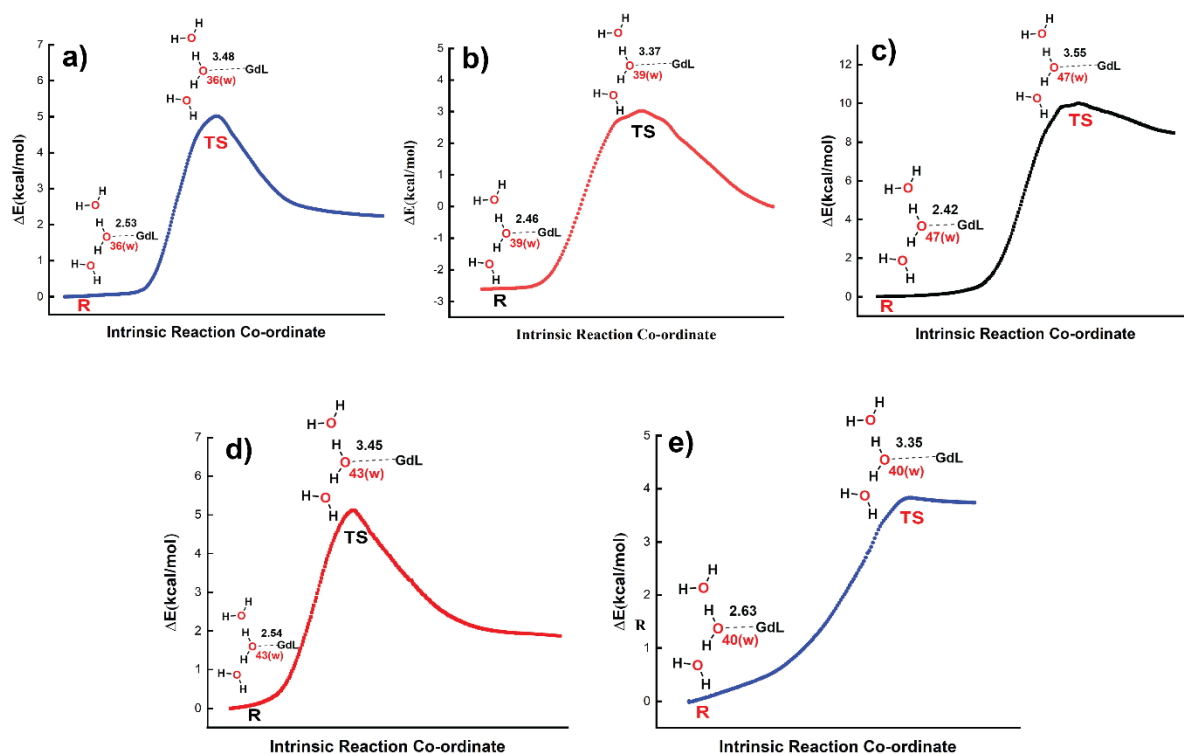

**Figure S5:** IRC plots for the dissociation of a) Gd-O36(w), b) Gd-O39(w), c) Gd-O47(w), bond of the  $[\text{Gd}(\text{cbda})(\text{H}_2\text{O})_3] \cdot 6\text{H}_2\text{O}$  complex (top) and d) Gd-O40(w), e) Gd-O43(w) bond for  $[\text{Gd}(\text{peada})(\text{H}_2\text{O})_2] \cdot 4\text{H}_2\text{O}$  (bottom) complexes respectively using LCRECP/TPSSH/6-31G(d,p) level of theory.

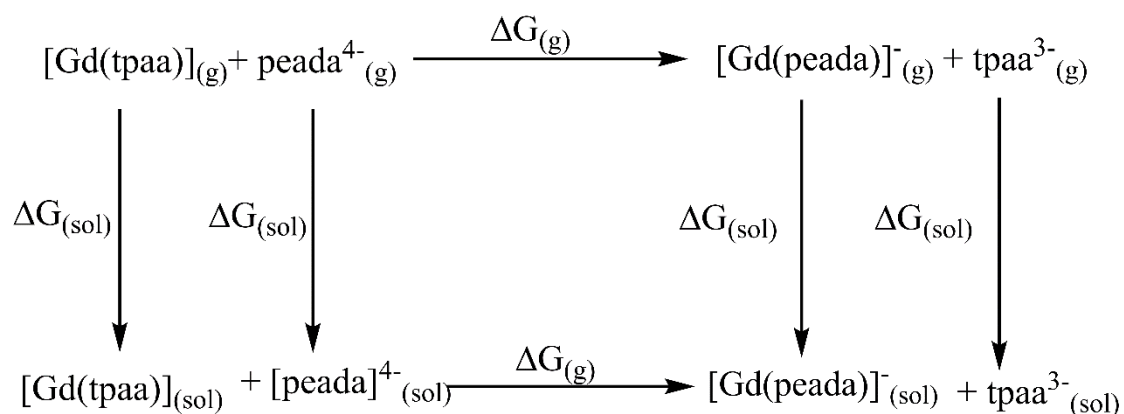

**Scheme S1.** Thermodynamic cycle for explaining the relative stabilities of  $[\text{Gd}(\text{peada})]^{-}$  and  $[\text{Gd}(\text{tpaa})]$  Complexes.



**Table S17:** Calculated Gd-O(w) bond length, electron density ( $\rho$ , au), electron localization function (ELF), and  $k_{\text{ex}}^{298}$  value of  $[\text{Gd}(\text{cbda})(\text{H}_2\text{O})_3] \cdot 6\text{H}_2\text{O}$  complex using LCRECP and different density functionals and basis sets.

| Method                        | Ln-Ow bond length | $\rho_{\text{BCP}}$ | ELF     | $k_{\text{ex}}^{298} / 10^6 \text{ S}^{-1}$ |
|-------------------------------|-------------------|---------------------|---------|---------------------------------------------|
| TPSSh/<br>6-31G(d,p)          | Gd-O36(w)= 2.527  | 0.0375              | 0.09674 | 43.68                                       |
|                               | Gd-O39(w)=2.455   | 0.0410              | 0.10054 | 4.2                                         |
|                               | Gd-O47(w)= 2.421  | 0.0429              | 0.10029 | 4.6                                         |
| TPSSh/<br>6-31+G(d,p)         | Gd-O36(w)= 2.562  | 0.0342              | 0.0939  | 118.9                                       |
|                               | Gd-O39(w)=2.489   | 0.0376              | 0.1009  | 6.9                                         |
|                               | Gd-O47(w)=2.448   | 0.0393              | 0.1012  | 3.5                                         |
| B3LYP/<br>6-31G(d,p)          | Gd-O36(w)= 2.545  | 0.0355              | 0.0952  | 55.5                                        |
|                               | Gd-O39(w)=2.470   | 0.0394              | 0.1031  | 2.3                                         |
|                               | Gd-O47(w)=2.431   | 0.0410              | 0.0979  | 12.8                                        |
| B3LYP-D3/<br>6-31G(d,p)       | Gd-O36(w)= 2.496  | 0.0378              | 0.0978  | 17.8                                        |
|                               | Gd-O39(w)=2.485   | 0.0418              | 0.10985 | 0.25                                        |
|                               | Gd-O47(w)=2.405   | 0.0450              | 0.1094  | 0.08                                        |
| B3LYP-D3/<br>6-31+G(d,p)      | Gd-O36(w)= 2.527  | 0.0340              | 0.0913  | 305.41                                      |
|                               | Gd-O39(w)=2.492   | 0.0346              | 0.0928  | 157.14                                      |
|                               | Gd-O47(w)=2.430   | 0.0419              | 0.1047  | 3.3                                         |
| $\omega$ B97XD/<br>6-31G(d,p) | Gd-O36(w)= 2.507  | 0.0357              | 0.0921  | 173.92                                      |
|                               | Gd-O39(w)=2.491   | 0.0364              | 0.0927  | 133.51                                      |
|                               | Gd-O47(w)=2.416   | 0.0433              | 0.1025  | 1.6                                         |

**Table S18:** Calculated Gd-O(w) bond length, electron density ( $\rho$ , au), electron localization function (ELF), and  $k_{\text{ex}}^{298}$  value of  $[\text{Gd}(\text{peada})(\text{H}_2\text{O})_2] \cdot 4\text{H}_2\text{O}$  complex using LCRECP and different density functionals and basis sets.

| Method                        | Ln-Ow bond length | $\rho_{\text{BCP}}$ | ELF    | $k_{\text{ex}}^{298} / 10^6 \text{ S}^{-1}$ |
|-------------------------------|-------------------|---------------------|--------|---------------------------------------------|
| TPSSh/<br>6-31G(d,p)          | Gd-O40(w)= 2.627  | 0.0342              | 0.0940 | 118.9                                       |
|                               | Gd-O43(w)=2.541   | 0.0364              | 0.0989 | 16.6                                        |
| TPSSh/<br>6-31+G(d,p)         | Gd-O40(w)= 2.709  | 0.0310              | 0.0926 | 522.75                                      |
|                               | Gd-O43(w)=2.578   | 0.0350              | 0.0976 | 20.48                                       |
| B3LYP/<br>6-31G(d,p)          | Gd-O40(w)= 2.650  | 0.0305              | 0.0910 | 944.94                                      |
|                               | Gd-O43(w)=2.572   | 0.0349              | 0.0985 | 35.5                                        |
| B3LYP-D3/<br>6-31G(d,p)       | Gd-O40(w)= 2.588  | 0.0350              | 0.0959 | 56.6                                        |
|                               | Gd-O43(w)=2.531   | 0.0398              | 0.1006 | 4.7                                         |
| B3LYP-D3/<br>6-31+G(d,p)      | Gd-O40(w)= 2.650  | 0.0300              | 0.0908 | 1329.08                                     |
|                               | Gd-O43(w)=2.550   | 0.0335              | 0.0943 | 140.38                                      |
| $\omega$ B97XD/<br>6-31G(d,p) | Gd-O40(w)= 2.60   | 0.0339              | 0.0976 | 75.5                                        |
|                               | Gd-O43(w)=2.542   | 0.0411              | 0.0986 | 10.23                                       |

**Table S19:** Activation energy values of [Gd(cbda)(H<sub>2</sub>O)<sub>3</sub>].6H<sub>2</sub>O and [Gd(peada)(H<sub>2</sub>O)<sub>2</sub>]<sup>-</sup>.4H<sub>2</sub>O complexes calculated using SCRECP/TPSSh/6-31G(d,p) theoretical level.

| Activation parameters            | [Gd(cbda)(H <sub>2</sub> O) <sub>3</sub> ].6H <sub>2</sub> O |           |           | [Gd(peada)(H <sub>2</sub> O) <sub>2</sub> ] <sup>-</sup> .4H <sub>2</sub> O |           |
|----------------------------------|--------------------------------------------------------------|-----------|-----------|-----------------------------------------------------------------------------|-----------|
|                                  | Gd-O36(w)                                                    | Gd-O39(w) | Gd-O47(w) | Gd-O40(w)                                                                   | Gd-O43(w) |
| $\Delta E_a^\ddagger$ (kcal/mol) | 5.33                                                         | 7.02      | 10.29     | -0.63                                                                       | 5.2       |
| $r_{Ga-O}$ /Å                    | 2.46                                                         | 2.43      | 2.36      | 2.62                                                                        | 2.50      |
| $r_{Gd-O(TS)}$ /Å                | 3.42                                                         | 3.34      | 3.50      | 2.98                                                                        | 3.54      |
| $\Delta H^\ddagger$ (kcal/mol)   | 4.7                                                          | 6.27      | 9.78      | -0.78                                                                       | 4.26      |
| $\Delta G^\ddagger$ (kcal/mol)   | 4.26                                                         | 5.31      | 9.16      | 1.081                                                                       | 3.25      |
| $\Delta S^\ddagger$ (J/mol/K)    | 4.19                                                         | 13.51     | 8.78      | -26.10                                                                      | 13.80     |

**Table S20:** Bonding behavior of the [Gd(cbda)(H<sub>2</sub>O)<sub>3</sub>].6H<sub>2</sub>O and [Gd(peada)(H<sub>2</sub>O)<sub>2</sub>]<sup>-</sup>.4H<sub>2</sub>O complexes from ETS analysis (in kJ/mol).

| Metal     | Ligands                 | $\Delta E_{int}$ | $\Delta E_{pauli}$ | $\Delta E_{oi}$ | $\Delta V_{elst}$ | <sup>a</sup> %elst |
|-----------|-------------------------|------------------|--------------------|-----------------|-------------------|--------------------|
| <b>La</b> | Cbda+H <sub>2</sub> O   | -5202.50         | 811.51             | -1765.70        | -4248.31          | 70.64              |
|           | Peada+ H <sub>2</sub> O | -5954.71         | 732.18             | -1733.36        | -4953.53          | 74.07              |
| <b>Lu</b> | Cbda+H <sub>2</sub> O   | -5618.75         | 601.31             | -1925.46        | -4294.60          | 69.04              |
|           | Peada+ H <sub>2</sub> O | -6479.69         | 711.38             | -2029.73        | -5161.34          | 71.77              |

$$^a \%elst = \Delta V_{elst} / (\Delta V_{elst} + \Delta E_{oi})$$

**Table S21:** Cartesian coordinates (Å) of [Gd(tpaa)(H<sub>2</sub>O)<sub>2</sub>] complex (without explicit water molecules) optimized at TPSSh/LCRECP/6-31G(d,p), aqueous solution (0 Imaginary Frequency).

| Atoms | X           | Y           | Z           |
|-------|-------------|-------------|-------------|
| C     | 2.30577300  | 3.73966400  | 1.60603400  |
| C     | 1.67740800  | 2.50511600  | 1.40738300  |
| C     | 1.32093500  | 2.99074500  | -0.83557700 |
| C     | 1.91816600  | 4.24379500  | -0.71272000 |
| C     | 2.41742300  | 4.62444500  | 0.53339600  |
| H     | 2.70083100  | 3.99373400  | 2.58364300  |
| H     | 1.98801400  | 4.87837900  | -1.58795700 |
| H     | 2.89900800  | 5.58775100  | 0.66577600  |
| N     | 1.18892500  | 2.14342800  | 0.20639100  |
| C     | 1.47786300  | 1.52235200  | 2.53715800  |
| N     | 1.53175000  | 0.12321700  | 2.04586900  |
| C     | 0.91706300  | -0.79978400 | 3.03345100  |
| C     | -1.27067400 | -0.66158100 | 4.35575100  |
| C     | -2.61602400 | -0.28902100 | 4.39385200  |
| C     | -3.20080800 | 0.27485100  | 3.25833500  |
| C     | -2.42138500 | 0.41263300  | 2.11079300  |
| C     | -0.55804000 | -0.49261000 | 3.16459200  |
| H     | -0.77547600 | -1.06076200 | 5.23424300  |
| H     | -3.18993600 | -0.41174800 | 5.30657400  |
| H     | -4.22855000 | 0.61727900  | 3.24269400  |
| N     | -1.13835000 | 0.00989400  | 2.06110300  |
| C     | -2.94662200 | 1.06363800  | 0.84664700  |
| C     | 0.80286200  | 2.49539400  | -2.17085000 |
| O     | 0.83657900  | 3.24437900  | -3.15218400 |
| O     | 0.36324700  | 1.27154600  | -2.15447000 |
| O     | -4.11913900 | 1.45293400  | 0.80459600  |
| O     | -2.06572700 | 1.15855400  | -0.10491300 |
| C     | 2.94667400  | -0.23968000 | 1.80881000  |
| C     | 3.08236000  | -1.49048800 | 0.97722600  |
| C     | 4.15015000  | -2.37781700 | 1.14978200  |
| C     | 4.25973100  | -3.47711600 | 0.29760200  |
| C     | 3.29641000  | -3.66165700 | -0.69438800 |
| C     | 2.25372500  | -2.74075800 | -0.79103600 |
| H     | 4.87587200  | -2.20489900 | 1.93713000  |
| H     | 5.07926000  | -4.17923100 | 0.41143900  |
| H     | 3.32273400  | -4.49609300 | -1.38471900 |
| N     | 2.14860800  | -1.67469400 | 0.02713200  |
| C     | 1.15997800  | -2.89767200 | -1.82723200 |
| O     | 1.21032900  | -3.84815300 | -2.61675600 |
| O     | 0.23399300  | -1.98789100 | -1.78239400 |
| H     | 1.06047000  | -1.82245100 | 2.66566100  |
| H     | 1.40759100  | -0.73139300 | 4.01480400  |

|    |             |             |             |
|----|-------------|-------------|-------------|
| H  | 2.21808200  | 1.69703500  | 3.33002200  |
| H  | 0.48983700  | 1.69476100  | 2.97375900  |
| H  | 3.40679800  | 0.59000000  | 1.25927800  |
| H  | 3.49575500  | -0.34603100 | 2.75494600  |
| Gd | -0.02341800 | -0.11908800 | -0.29920500 |
| O  | -1.87007100 | -0.11680100 | -2.36852600 |
| H  | -2.33022200 | 0.53383000  | -1.79423800 |
| H  | -1.20430500 | 0.43057600  | -2.83143200 |
| O  | -1.78438800 | -1.98541300 | -0.14260600 |
| H  | -2.69186300 | -1.73545300 | -0.37310100 |
| H  | -1.39372300 | -2.34911000 | -0.96901000 |

E = -1668.864651Hartree

Zero-point correction = 0.389638 Hartree/particle

Sum of electronic and thermal Energies = -1668.443462 Hartree

Sum of electronic and thermal Enthalpies = -1668.442518 Hartree

Sum of electronic and thermal Free Energies = -1668.537182 Hartree

**Table S22.** Cartesian coordinates (Å) of [Gd(dpaa)(H<sub>2</sub>O)<sub>3</sub>] complex (without explicit water molecules) optimized at TPSSh/LCRECP/6-31G(d,p), aqueous solution (0 Imaginary Frequency).

| Atoms | X           | Y           | Z           |
|-------|-------------|-------------|-------------|
| N     | 3.01838600  | -0.12670100 | 1.18555900  |
| C     | 3.86035700  | 0.34878300  | 0.05956100  |
| H     | 4.93033300  | 0.20495200  | 0.26421600  |
| H     | 3.69122100  | 1.42676900  | -0.05231800 |
| C     | 3.30501700  | -1.54792600 | 1.50537300  |
| C     | 2.10191500  | -2.27449100 | 2.13096600  |
| O     | 0.93009200  | -1.82479600 | 1.77424800  |
| O     | 2.30475800  | -3.24312400 | 2.86629300  |
| N     | 1.38128700  | 2.06561700  | 1.69077100  |
| C     | 2.57313600  | 2.04595300  | 2.31333800  |
| C     | -0.71036400 | 3.13142700  | 1.03051000  |
| O     | -1.00181500 | 1.98149500  | 0.49772800  |
| O     | -1.43174200 | 4.13555600  | 1.03540400  |
| O     | -0.31501200 | -1.60174300 | -1.24727900 |
| N     | 2.18663700  | -0.75849000 | -1.29415600 |
| C     | 3.47126400  | -0.36706800 | -1.21581400 |
| C     | 3.26120900  | 0.70220700  | 2.38763200  |
| H     | 2.84289400  | 0.16106100  | 3.24475300  |
| H     | 4.33602700  | 0.82660200  | 2.57877700  |
| C     | 3.09785600  | 3.18461700  | 2.93437600  |
| C     | 2.34895400  | 4.36225300  | 2.92934700  |

|    |             |             |             |
|----|-------------|-------------|-------------|
| C  | 1.09686900  | 4.36815500  | 2.31335800  |
| C  | 0.64965200  | 3.19773500  | 1.70131000  |
| C  | 4.38353800  | -0.63952700 | -2.24014500 |
| C  | 3.94446100  | -1.34109900 | -3.36453400 |
| C  | 2.62021700  | -1.77963900 | -3.42146000 |
| C  | 1.77157900  | -1.47115400 | -2.35939200 |
| C  | 0.33107400  | -1.95053900 | -2.31746600 |
| O  | -0.11077300 | -2.61692200 | -3.26118100 |
| H  | 5.41546500  | -0.31843200 | -2.14865600 |
| H  | 4.63401400  | -1.56256100 | -4.17263500 |
| H  | 2.23389000  | -2.35684500 | -4.25288400 |
| H  | 4.06954800  | 3.14206400  | 3.41440300  |
| H  | 2.73553900  | 5.25856200  | 3.40347200  |
| H  | 0.46252700  | 5.24603500  | 2.29120500  |
| O  | -0.18047400 | 1.21967200  | -1.82633700 |
| H  | -0.73080400 | 0.70806300  | -2.43811200 |
| H  | -0.78475400 | 1.82574200  | -1.34612000 |
| O  | -0.63237100 | 0.00907500  | 2.78022400  |
| H  | -0.27176200 | -0.88860900 | 2.93905900  |
| H  | -1.59223200 | -0.10861100 | 2.70320100  |
| H  | 3.53522300  | -2.07375900 | 0.57376200  |
| O  | -2.04164900 | -0.70083400 | 0.40761800  |
| H  | -1.95232900 | -1.24587600 | -0.40424500 |
| H  | -2.62438800 | 0.04448100  | 0.19090500  |
| Gd | 0.39504900  | 0.01713800  | 0.40752200  |
| H  | 4.17799400  | -1.64566100 | 2.16153800  |

E = -1498.091303 Hartree

Zero-point correction = 0.34816 Hartree/particle

Sum of electronic and thermal Energies = -1497.714261 Hartree

Sum of electronic and thermal Enthalpies = -1497.713317 Hartree

Sum of electronic and thermal Free Energies = -1497.801429 Hartree

**Table S23:** Cartesian coordinates (Å) of [Gd(cbda)(H<sub>2</sub>O)<sub>3</sub>].6H<sub>2</sub>O complex, optimized at TPSSh/LCRECP/6-31G(d,p), aqueous solution (0 Imaginary Frequency).

| Atoms | X          | Y           | Z          |
|-------|------------|-------------|------------|
| N     | 2.95004600 | -0.23185300 | 1.26376300 |
| C     | 3.82156100 | 0.34290200  | 0.21606900 |
| H     | 4.88923100 | 0.19938900  | 0.43598100 |
| H     | 3.64547800 | 1.42478700  | 0.19436000 |
| C     | 3.23765500 | -1.68552900 | 1.49111600 |
| C     | 1.94772800 | -2.32900200 | 2.04299600 |
| O     | 0.89373000 | -2.12298100 | 1.33987600 |

**Electronic Supplementary Material (ESI) for RSC Advances. This journal is © The Royal Society of Chemistry 2022**

|   |             |             |             |
|---|-------------|-------------|-------------|
| O | 1.97999700  | -3.00196200 | 3.09806300  |
| N | 1.39004100  | 2.02307300  | 1.61714500  |
| C | 2.52012500  | 1.93637400  | 2.33696700  |
| C | -0.53642200 | 3.18548100  | 0.77743200  |
| O | -1.08632500 | 2.02182900  | 0.72617500  |
| O | -1.02244500 | 4.24315200  | 0.32045900  |
| O | -0.16823500 | -1.76155500 | -1.44184300 |
| N | 2.22019800  | -0.62899300 | -1.32085300 |
| C | 3.49356500  | -0.24140800 | -1.13693000 |
| C | 3.08412000  | 0.54739100  | 2.51073300  |
| H | 2.50260800  | 0.03284400  | 3.28445000  |
| H | 4.12484500  | 0.61069700  | 2.85586700  |
| C | 3.10722000  | 3.06127300  | 2.92892100  |
| C | 2.50890000  | 4.30987400  | 2.75444800  |
| C | 1.33030200  | 4.39766300  | 2.01191600  |
| C | 0.79667000  | 3.22335900  | 1.48130800  |
| C | 4.46395000  | -0.39169200 | -2.13535600 |
| C | 4.09528100  | -0.94838200 | -3.35970700 |
| C | 2.77888200  | -1.37768500 | -3.53883500 |
| C | 1.88110100  | -1.21592100 | -2.48462600 |
| C | 0.46473600  | -1.72796500 | -2.55738700 |
| O | 0.00548500  | -2.07174600 | -3.67330700 |
| H | 5.48669200  | -0.08323000 | -1.94626500 |
| H | 4.82816700  | -1.06710900 | -4.15110400 |
| H | 2.43993500  | -1.84364400 | -4.45618600 |
| H | 4.01833700  | 2.95392600  | 3.50780300  |
| H | 2.95299500  | 5.19699800  | 3.19419800  |
| H | 0.81522400  | 5.33716500  | 1.85043000  |
| O | -0.76294300 | 0.87289600  | -1.73607800 |
| H | -1.30369400 | 0.27298300  | -2.30334500 |
| H | -1.30658800 | 1.70548600  | -1.66870500 |
| O | -0.24307200 | -0.08068500 | 2.79967300  |
| H | -0.40346700 | -0.97045500 | 3.22237100  |
| H | -0.97891100 | 0.52530900  | 3.08755800  |
| H | 3.36741500  | -2.11374400 | 0.49160600  |
| C | 4.47971400  | -1.99615200 | 2.32866700  |
| H | 4.66684800  | -3.07245400 | 2.29940900  |
| H | 5.36651200  | -1.48956900 | 1.93390500  |
| H | 4.34443700  | -1.71415900 | 3.37547200  |
| O | -2.02767200 | -0.96087900 | 0.58506900  |
| H | -2.42162500 | -1.56443100 | -0.11139600 |
| H | -2.73197400 | -0.75772200 | 1.23916300  |
| O | -0.53318700 | -2.50198700 | 3.98257100  |
| H | -0.41302100 | -2.37531100 | 4.93550800  |
| H | 0.34585500  | -2.84612000 | 3.66344400  |
| O | -2.31426700 | 1.59998300  | 3.19775700  |
| H | -2.09646000 | 1.89327100  | 2.28686000  |
| H | -3.06403700 | 0.98154900  | 3.06447700  |
| O | -4.05846900 | -0.41508800 | 2.39408700  |
| H | -4.24526600 | -1.14641300 | 3.00231600  |

|    |             |             |             |
|----|-------------|-------------|-------------|
| H  | -4.90579100 | -0.20906900 | 1.97075400  |
| O  | -2.75366800 | -2.59896700 | -1.36375900 |
| H  | -1.77369000 | -2.59749000 | -1.48887100 |
| H  | -3.01472500 | -1.99524000 | -2.09187400 |
| O  | -2.32375800 | -0.79180200 | -3.37787800 |
| H  | -2.68419800 | -0.39351900 | -4.18320300 |
| H  | -1.56312100 | -1.36750000 | -3.66329400 |
| O  | -2.32160800 | 3.11096300  | -1.78708300 |
| H  | -2.00550900 | 3.64083600  | -2.53394200 |
| H  | -1.99946600 | 3.59942900  | -0.98559200 |
| Gd | 0.21988800  | -0.08132600 | 0.38827400  |

E = -1996.134446 Hartree

Zero-point correction = 0.526378 Hartree/particle

Sum of electronic and thermal Energies = -1995.563060 Hartree

Sum of electronic and thermal Enthalpies = -1995.562116 Hartree

Sum of electronic and thermal Free Energies = -1995.684032 Hartree

**Table S24:** Cartesian coordinates (Å) of [Gd(cbda)(H<sub>2</sub>O)<sub>3</sub>].6H<sub>2</sub>O complex, optimized at TPSSh/SCRECP/6-31G(d,p), aqueous solution (0 Imaginary Frequency).

| Atoms | X           | Y           | Z           |
|-------|-------------|-------------|-------------|
| N     | 2.82766200  | -0.21901000 | 1.27228500  |
| C     | 3.77278700  | 0.28271900  | 0.24857400  |
| H     | 4.82055000  | 0.08620200  | 0.51691700  |
| H     | 3.65577300  | 1.37152300  | 0.19662500  |
| C     | 3.02681000  | -1.68182500 | 1.54480000  |
| C     | 1.67951400  | -2.23898300 | 2.04657400  |
| O     | 0.66501000  | -1.95963100 | 1.31796900  |
| O     | 1.62893000  | -2.91869100 | 3.10074400  |
| N     | 1.35429100  | 2.09443700  | 1.52792500  |
| C     | 2.46318800  | 1.99205900  | 2.27716400  |
| C     | -0.57580900 | 3.25435200  | 0.71186700  |
| O     | -1.07461400 | 2.07809100  | 0.58518400  |
| O     | -1.11060700 | 4.32198800  | 0.33443900  |
| O     | -0.24939100 | -1.63976800 | -1.44645600 |
| N     | 2.17483500  | -0.63899600 | -1.30924400 |
| C     | 3.46157500  | -0.31547500 | -1.09985800 |
| C     | 2.96879900  | 0.58836300  | 2.50107900  |
| H     | 2.34274300  | 0.12834500  | 3.27453900  |
| H     | 4.00307700  | 0.61359500  | 2.86922400  |
| C     | 3.05702400  | 3.11041100  | 2.87477900  |
| C     | 2.47669900  | 4.36620200  | 2.68860100  |
| C     | 1.30033300  | 4.46412700  | 1.94355700  |

**Electronic Supplementary Material (ESI) for RSC Advances. This journal is © The Royal Society of Chemistry 2022**

|    |             |             |             |
|----|-------------|-------------|-------------|
| C  | 0.76402300  | 3.29622800  | 1.40161900  |
| C  | 4.45021200  | -0.54579800 | -2.06426600 |
| C  | 4.08625300  | -1.12007300 | -3.28206300 |
| C  | 2.75477700  | -1.48796700 | -3.48503200 |
| C  | 1.83875900  | -1.24700300 | -2.46260200 |
| C  | 0.40395000  | -1.69673000 | -2.54747900 |
| O  | -0.04651600 | -2.07877000 | -3.65532800 |
| H  | 5.48237200  | -0.28664000 | -1.85409300 |
| H  | 4.83319800  | -1.30141000 | -4.04802800 |
| H  | 2.41686900  | -1.96810900 | -4.39546800 |
| H  | 3.95580400  | 2.99258500  | 3.47063100  |
| H  | 2.92709100  | 5.24911100  | 3.13058400  |
| H  | 0.78760000  | 5.40619000  | 1.78932400  |
| O  | -0.63455600 | 0.97877100  | -1.80487100 |
| H  | -1.19224200 | 0.40854900  | -2.38474800 |
| H  | -1.13156200 | 1.83905800  | -1.76647600 |
| O  | -0.25764700 | 0.17160900  | 2.68439500  |
| H  | -0.40616000 | -0.67074200 | 3.17649100  |
| H  | -1.02326400 | 0.76319900  | 2.90794400  |
| H  | 3.17683800  | -2.14064900 | 0.56182200  |
| C  | 4.21036300  | -2.03863300 | 2.44503600  |
| H  | 4.32955800  | -3.12480800 | 2.45910800  |
| H  | 5.14254600  | -1.60215600 | 2.07218600  |
| H  | 4.05076300  | -1.71151900 | 3.47515100  |
| O  | -2.03525900 | -0.64309900 | 0.52245500  |
| H  | -2.45983900 | -1.19185300 | -0.19655300 |
| H  | -2.38531900 | -0.98965100 | 1.38103300  |
| O  | -0.74904300 | -2.22267300 | 4.01947600  |
| H  | -0.59718700 | -2.12485400 | 4.97054500  |
| H  | 0.07686000  | -2.66255700 | 3.64766100  |
| O  | -2.62646800 | 1.45371700  | 2.86427100  |
| H  | -2.46014400 | 1.63644800  | 1.91635300  |
| H  | -3.04646600 | 0.56971300  | 2.88487700  |
| O  | -3.04788100 | -1.36365000 | 2.91755800  |
| H  | -2.30462700 | -1.82471900 | 3.38214300  |
| H  | -3.78721400 | -1.98676700 | 2.88048500  |
| O  | -2.88799500 | -2.26508500 | -1.41603500 |
| H  | -1.90750000 | -2.35223700 | -1.50204800 |
| H  | -3.07150700 | -1.67308600 | -2.17620300 |
| O  | -2.26032200 | -0.58434700 | -3.48553400 |
| H  | -2.55615600 | -0.17095600 | -4.30920300 |
| H  | -1.54699200 | -1.23188100 | -3.73387600 |
| O  | -2.12970700 | 3.27805700  | -1.96588900 |
| H  | -1.67931700 | 3.83975500  | -2.61402500 |
| H  | -1.93870000 | 3.71683300  | -1.09724500 |
| Gd | 0.21443700  | 0.04870500  | 0.30063200  |

E= -2725.566017 Hartree

Zero-point correction = 0.528291 Hartree/particle



Sum of electronic and thermal Energies = -2724.993756 Hartree

Sum of electronic and thermal Enthalpies = -2724.992812 Hartree

Sum of electronic and thermal Free Energies = -2725.113212 Hartree

**Table S25:** Cartesian coordinates (Å) of [Gd(peada)(H<sub>2</sub>O)<sub>2</sub>].4H<sub>2</sub>O complex, optimized at TPSSh/LCRECP/6-31G(d,p), aqueous solution (0 Imaginary Frequency).

| Atoms | X           | Y           | Z           |
|-------|-------------|-------------|-------------|
| N     | -0.32368500 | -2.40870000 | 0.61229000  |
| N     | 2.42950900  | -1.38619900 | 0.04469400  |
| C     | 0.89181700  | -2.94773700 | 1.26545100  |
| C     | 2.10662200  | -2.80319600 | 0.34880200  |
| C     | -0.65372600 | -3.20920600 | -0.59755500 |
| C     | 3.27612500  | -0.80163600 | 1.10946000  |
| C     | -0.11804900 | -2.60643900 | -1.90560400 |
| C     | 2.48808200  | -0.23589800 | 2.29616200  |
| O     | 0.11644900  | -3.37234000 | -2.85504000 |
| O     | 3.06940100  | -0.06261100 | 3.37426800  |
| O     | 1.25528600  | 0.09809500  | 2.04903400  |
| O     | -0.00091800 | -1.32236100 | -1.91826000 |
| C     | 3.11259200  | -1.24938200 | -1.26488100 |
| C     | 3.06074000  | 0.22482800  | -1.69136500 |
| C     | -1.47653800 | -2.40160400 | 1.54076500  |
| O     | 4.11050000  | 0.80453800  | -2.05896900 |
| O     | 1.91160100  | 0.78784200  | -1.60866600 |
| C     | -2.63193100 | -1.66619800 | 0.89104400  |
| C     | -3.97275800 | -2.01636900 | 1.08423600  |
| C     | -4.96438200 | -1.26677400 | 0.44720700  |
| C     | -4.59421200 | -0.18454000 | -0.35298400 |
| C     | -3.23467800 | 0.09722500  | -0.49708500 |
| N     | -2.28289700 | -0.63652000 | 0.10213200  |
| H     | -6.01076000 | -1.52399600 | 0.57591200  |
| H     | -4.22907400 | -2.86183100 | 1.71376600  |
| H     | -5.32242500 | 0.44057500  | -0.85572000 |
| C     | -2.74693400 | 1.30898400  | -1.26636800 |
| O     | -3.58483400 | 2.15939500  | -1.63081500 |
| O     | -1.46877900 | 1.40212400  | -1.42469100 |
| H     | 1.04073800  | -2.40471500 | 2.20133100  |
| H     | 0.76283000  | -4.01422100 | 1.50941100  |
| H     | 2.96705000  | -3.30698700 | 0.81289100  |
| H     | 1.91217400  | -3.31686600 | -0.59669300 |
| H     | 4.15176200  | -1.60141000 | -1.23008800 |
| H     | 2.55621600  | -1.83633600 | -2.00104300 |
| H     | 4.02524700  | -1.51935400 | 1.46977600  |
| H     | 3.82491100  | 0.04721500  | 0.68431700  |
| H     | -1.78352400 | -3.41684900 | 1.83011800  |

|    |             |             |             |
|----|-------------|-------------|-------------|
| H  | -1.17366700 | -1.87297400 | 2.45283600  |
| O  | 1.05677400  | 2.63030200  | 0.22429900  |
| H  | 0.47399700  | 3.22686200  | -0.32401100 |
| H  | 1.96660600  | 2.74436900  | -0.17158100 |
| O  | -1.21661900 | 1.42419100  | 1.62915300  |
| H  | -0.61491600 | 1.95673200  | 2.21408900  |
| H  | -1.97440200 | 2.01660800  | 1.39978600  |
| H  | -1.74238500 | -3.24741500 | -0.70616900 |
| H  | -0.30755800 | -4.24469600 | -0.49046300 |
| O  | 3.50829800  | 3.17792900  | -0.83712000 |
| H  | 4.18623100  | 3.19044900  | -0.14569900 |
| H  | 3.74654500  | 2.39546600  | -1.40221400 |
| O  | 0.78160000  | 2.66813000  | 2.94140900  |
| H  | 1.10142800  | 1.73978700  | 2.98798200  |
| H  | 1.01433800  | 2.88788000  | 2.00706500  |
| O  | -3.32966400 | 3.12904400  | 1.05767000  |
| H  | -3.59040700 | 2.99856900  | 0.12266000  |
| H  | -4.09818100 | 2.83235900  | 1.56743400  |
| O  | -0.60380300 | 3.95556300  | -1.42050000 |
| H  | -1.02538800 | 3.07909500  | -1.61759400 |
| H  | -0.12802500 | 4.19484000  | -2.22966200 |
| Gd | 0.17818700  | 0.17420500  | -0.08925900 |

E = -1841.788663 Hartree

Zero-point correction = 0.458929 Hartree/particle

Sum of electronic and thermal Energies = -1841.291017 Hartree

Sum of electronic and thermal Enthalpies = -1841.290073 Hartree

Sum of electronic and thermal Free Energies = -1841.399218 Hartree

**Table S26:** Cartesian coordinates (Å) of [Gd(peada)(H<sub>2</sub>O)<sub>2</sub>].4H<sub>2</sub>O complex, optimized at TPSSH/SCRECP/6-31G(d,p), aqueous solution (0 Imaginary Frequency).

| Atoms | X           | Y           | Z           |
|-------|-------------|-------------|-------------|
| N     | -0.32101800 | -2.45499800 | 0.57998800  |
| N     | 2.40347800  | -1.36122000 | 0.05589000  |
| C     | 0.89663200  | -2.98374300 | 1.23923900  |
| C     | 2.12018500  | -2.78968000 | 0.34587300  |
| C     | -0.66876800 | -3.27412300 | -0.61213000 |
| C     | 3.17992600  | -0.72135000 | 1.14798400  |
| C     | -0.23915400 | -2.64352900 | -1.94598300 |
| C     | 2.29097000  | -0.06673100 | 2.21447300  |
| O     | -0.20123300 | -3.37424000 | -2.94970600 |
| O     | 2.83060000  | 0.51014800  | 3.17903200  |
| O     | 1.02386100  | -0.11424100 | 2.00071700  |
| O     | 0.01157600  | -1.38017000 | -1.91504900 |
| C     | 3.12321400  | -1.20729300 | -1.23151200 |

**Electronic Supplementary Material (ESI) for RSC Advances. This journal is © The Royal Society of Chemistry 2022**

|    |             |             |             |
|----|-------------|-------------|-------------|
| C  | 3.00441600  | 0.25297100  | -1.68276400 |
| C  | -1.46068900 | -2.40631200 | 1.52365600  |
| O  | 4.02143100  | 0.86616500  | -2.08998100 |
| O  | 1.83636800  | 0.76531600  | -1.58292700 |
| C  | -2.62102600 | -1.69461000 | 0.86027600  |
| C  | -3.96444700 | -2.02282600 | 1.07158600  |
| C  | -4.95122300 | -1.26432900 | 0.43634900  |
| C  | -4.57453000 | -0.18985800 | -0.37186700 |
| C  | -3.21271800 | 0.06700500  | -0.53617200 |
| N  | -2.26794000 | -0.68459300 | 0.04953700  |
| H  | -5.99994500 | -1.50385700 | 0.57974500  |
| H  | -4.22755900 | -2.85411400 | 1.71686100  |
| H  | -5.29959600 | 0.44926400  | -0.86142900 |
| C  | -2.69755500 | 1.28032000  | -1.28124100 |
| O  | -3.51277100 | 2.15813700  | -1.63457000 |
| O  | -1.41712200 | 1.34876300  | -1.41697600 |
| H  | 1.02186300  | -2.45482900 | 2.18498400  |
| H  | 0.78612500  | -4.05809000 | 1.45547800  |
| H  | 2.98960400  | -3.27237000 | 0.81623200  |
| H  | 1.95473600  | -3.29558100 | -0.60959100 |
| H  | 4.17575500  | -1.51077600 | -1.16412000 |
| H  | 2.61633800  | -1.82728200 | -1.97634200 |
| H  | 3.87217700  | -1.43039300 | 1.62335700  |
| H  | 3.79575700  | 0.07692600  | 0.71992000  |
| H  | -1.76325300 | -3.40535600 | 1.86841500  |
| H  | -1.14200100 | -1.82582100 | 2.39793100  |
| O  | 1.03913800  | 2.48662600  | 0.31617400  |
| H  | 0.42401700  | 3.10524300  | -0.16296300 |
| H  | 1.91389000  | 2.66139200  | -0.12958300 |
| O  | -1.17487000 | 1.30467600  | 1.60043800  |
| H  | -0.52943500 | 1.70477900  | 2.23633000  |
| H  | -1.81941900 | 2.01592600  | 1.37402300  |
| H  | -1.75659000 | -3.38749700 | -0.66154500 |
| H  | -0.25499900 | -4.28669400 | -0.52937800 |
| O  | 3.35900200  | 3.24433000  | -0.93895200 |
| H  | 4.07232500  | 3.29845600  | -0.28603800 |
| H  | 3.60318000  | 2.45794900  | -1.49729100 |
| O  | 0.81022600  | 2.62556800  | 3.04902300  |
| H  | 1.40118600  | 1.87882700  | 3.29093900  |
| H  | 1.03312100  | 2.75882800  | 2.09650600  |
| O  | -3.08878100 | 3.26816300  | 0.98674700  |
| H  | -3.34028700 | 3.11386200  | 0.05282400  |
| H  | -3.86963200 | 2.98922900  | 1.48798200  |
| O  | -0.56798400 | 3.91378500  | -1.34289500 |
| H  | -0.98084700 | 3.04094300  | -1.57067200 |
| H  | 0.04416400  | 4.09003400  | -2.07320400 |
| Gd | 0.14866100  | 0.06071100  | -0.12627700 |

E = -2571.215711 Hartree

Zero-point correction = 0.460043 Hartree/particle

Sum of electronic and thermal Energies = -2570.717284 Hartree

Sum of electronic and thermal Enthalpies = -2570.716340 Hartree

Sum of electronic and thermal Free Energies = -2570.826393 Hartree

**Table S27:** Cartesian coordinates (Å) of [Gd(cbda)(H<sub>2</sub>O)<sub>3</sub>].6H<sub>2</sub>O complex, corresponding to Gd-O36(w) bond optimized at TPSSh/LCRECP/6-31G(d,p), aqueous solution (1 Imaginary Frequency).

| Atoms | X           | Y           | Z           |
|-------|-------------|-------------|-------------|
| N     | 2.98410800  | -0.28789200 | 1.34107400  |
| C     | 3.88011500  | 0.26622200  | 0.30036700  |
| H     | 4.93993900  | 0.08953700  | 0.53016400  |
| H     | 3.73729700  | 1.35289700  | 0.28092900  |
| C     | 3.27826800  | -1.73855900 | 1.59111200  |
| C     | 1.98236100  | -2.39429800 | 2.11098500  |
| O     | 0.94332800  | -2.19522100 | 1.37816000  |
| O     | 1.99148000  | -3.06748300 | 3.16348300  |
| N     | 1.41194000  | 1.96741200  | 1.61803600  |
| C     | 2.52944100  | 1.90166100  | 2.36051300  |
| C     | -0.48830800 | 3.10112300  | 0.67330800  |
| O     | -1.01613500 | 1.92700800  | 0.59558000  |
| O     | -0.97873400 | 4.15777600  | 0.22408700  |
| O     | -0.18631500 | -1.59584300 | -1.43962100 |
| N     | 2.26010300  | -0.63145000 | -1.26306300 |
| C     | 3.54470800  | -0.29327400 | -1.06159700 |
| C     | 3.09331400  | 0.51743000  | 2.57793800  |
| H     | 2.49677300  | 0.01787500  | 3.34965300  |
| H     | 4.12731900  | 0.58991700  | 2.93917400  |
| C     | 3.10409900  | 3.04629200  | 2.92503800  |
| C     | 2.50690300  | 4.28735000  | 2.69731800  |
| C     | 1.34483300  | 4.35131000  | 1.92661200  |
| C     | 0.82261700  | 3.16087200  | 1.42156300  |
| C     | 4.51257400  | -0.44715700 | -2.06190400 |
| C     | 4.12698900  | -0.94391600 | -3.30675900 |
| C     | 2.79313200  | -1.30339000 | -3.51078600 |
| C     | 1.89788000  | -1.14556700 | -2.45477800 |
| C     | 0.45526200  | -1.57480200 | -2.55339900 |
| O     | -0.00962300 | -1.88351100 | -3.67331200 |
| H     | 5.54545600  | -0.18384200 | -1.86070500 |
| H     | 4.85869900  | -1.06465600 | -4.09884700 |
| H     | 2.43880900  | -1.71111400 | -4.44979600 |
| H     | 4.00528000  | 2.96117900  | 3.52261700  |
| H     | 2.94191100  | 5.18889500  | 3.11618800  |
| H     | 0.83549200  | 5.28532800  | 1.72167900  |
| O     | -0.94198100 | 1.27003800  | -2.45282300 |

|    |             |             |             |
|----|-------------|-------------|-------------|
| H  | -1.53154400 | 0.59455800  | -2.84497400 |
| H  | -1.55232000 | 1.99033200  | -2.17021900 |
| O  | -0.15698300 | -0.12713300 | 2.86101200  |
| H  | -0.34917300 | -1.00761500 | 3.29420200  |
| H  | -0.88702100 | 0.50323600  | 3.11625600  |
| H  | 3.43977200  | -2.17181600 | 0.59782400  |
| C  | 4.49921700  | -2.02866000 | 2.46519600  |
| H  | 4.69399400  | -3.10380600 | 2.45479000  |
| H  | 5.39268100  | -1.52096600 | 2.08778500  |
| H  | 4.33313700  | -1.73373900 | 3.50391700  |
| O  | -1.96886300 | -0.96010500 | 0.62359300  |
| H  | -2.38386200 | -1.52916800 | -0.09058200 |
| H  | -2.65376300 | -0.79377700 | 1.30818600  |
| O  | -0.52157400 | -2.52813200 | 4.03061900  |
| H  | -0.41324900 | -2.41830600 | 4.98712200  |
| H  | 0.34980500  | -2.89644200 | 3.72054900  |
| O  | -2.20090600 | 1.58870700  | 3.13614900  |
| H  | -2.01313000 | 1.82684700  | 2.20356200  |
| H  | -2.95760100 | 0.96765300  | 3.06680100  |
| O  | -3.94472700 | -0.47596200 | 2.51021800  |
| H  | -4.08020900 | -1.19054700 | 3.15115400  |
| H  | -4.81551300 | -0.31289100 | 2.11680600  |
| O  | -2.74099400 | -2.53780900 | -1.35459300 |
| H  | -1.76462100 | -2.52387500 | -1.48698700 |
| H  | -3.01634500 | -1.96795500 | -2.10815500 |
| O  | -2.50870100 | -0.89112200 | -3.53502300 |
| H  | -2.95468300 | -0.81317900 | -4.39056100 |
| H  | -1.65283400 | -1.36854300 | -3.71133900 |
| O  | -2.67168500 | 3.36762500  | -1.76202700 |
| H  | -2.48915400 | 4.02172400  | -2.45258500 |
| H  | -2.15266900 | 3.69154200  | -0.98101000 |
| Gd | 0.30604700  | -0.14868400 | 0.46612100  |

E = -1996.126602 Hartree

Zero-point correction = 0.525290 Hartree/particle

Sum of electronic and thermal Energies = -1995.556321 Hartree

Sum of electronic and thermal Enthalpies = -1995.555377 Hartree

Sum of electronic and thermal Free Energies = -1995.677654 Hartree

**Table S28:** Cartesian coordinates (Å) of [Gd(cbda)(H<sub>2</sub>O)<sub>3</sub>].6H<sub>2</sub>O complex, corresponding to Gd-O39(w) bond optimized at TPSSh/LCRECP/6-31G(d,p), aqueous solution (1 Imaginary Frequency).

| Atoms | X          | Y           | Z          |
|-------|------------|-------------|------------|
| N     | 2.79121300 | -0.20155100 | 1.23500700 |
| C     | 3.76956700 | 0.26938500  | 0.22780600 |
| H     | 4.80642700 | 0.05978700  | 0.52597500 |

**Electronic Supplementary Material (ESI) for RSC Advances. This journal is © The Royal Society of Chemistry 2022**

|   |             |             |             |
|---|-------------|-------------|-------------|
| H | 3.67232600  | 1.36005700  | 0.16490900  |
| C | 2.93914200  | -1.66432500 | 1.52832800  |
| C | 1.58666200  | -2.17349100 | 2.07339900  |
| O | 0.55287900  | -1.86214600 | 1.37776200  |
| O | 1.55269400  | -2.86517600 | 3.11602600  |
| N | 1.28009600  | 2.10837900  | 1.53123100  |
| C | 2.40645900  | 2.00652400  | 2.25641300  |
| C | -0.61732400 | 3.29683600  | 0.65973300  |
| O | -1.14280700 | 2.13050500  | 0.51239400  |
| O | -1.10407700 | 4.36976300  | 0.24189700  |
| O | -0.21913000 | -1.62919600 | -1.57877500 |
| N | 2.20827700  | -0.64272100 | -1.37779500 |
| C | 3.49116500  | -0.33429800 | -1.12599400 |
| C | 2.93470000  | 0.60978700  | 2.46291200  |
| H | 2.31581000  | 0.15000900  | 3.24028800  |
| H | 3.97480400  | 0.64852900  | 2.81289500  |
| C | 3.00277400  | 3.12533200  | 2.85080900  |
| C | 2.41394600  | 4.37923900  | 2.68411300  |
| C | 1.23523500  | 4.48037800  | 1.94326700  |
| C | 0.69686300  | 3.31501300  | 1.39941600  |
| C | 4.50589400  | -0.58261300 | -2.05832400 |
| C | 4.17185000  | -1.15217500 | -3.28681400 |
| C | 2.84188500  | -1.49874900 | -3.53506100 |
| C | 1.89790400  | -1.24474600 | -2.54227800 |
| C | 0.45735700  | -1.66828800 | -2.67074300 |
| O | 0.02177300  | -2.01374700 | -3.79320500 |
| H | 5.53478800  | -0.33894500 | -1.81615800 |
| H | 4.94042000  | -1.34541400 | -4.02795500 |
| H | 2.52796400  | -1.97159800 | -4.45781800 |
| H | 3.91246200  | 3.00787800  | 3.42998800  |
| H | 2.86492100  | 5.26033400  | 3.12900400  |
| H | 0.72645600  | 5.42421400  | 1.78765900  |
| O | -0.74450000 | 1.00615300  | -1.95385700 |
| H | -1.28209600 | 0.42445600  | -2.54533700 |
| H | -1.24409500 | 1.86960300  | -1.91679600 |
| O | 0.05860400  | 0.28275500  | 3.54446100  |
| H | -0.23585600 | -0.60637500 | 3.83157600  |
| H | -0.78074500 | 0.79239800  | 3.44966400  |
| H | 3.05275500  | -2.14719800 | 0.55132500  |
| C | 4.12793800  | -2.04934100 | 2.41115900  |
| H | 4.20402700  | -3.13862400 | 2.44845600  |
| H | 5.06746500  | -1.65900500 | 2.00731800  |
| H | 4.00533400  | -1.69131900 | 3.43597500  |
| O | -2.10373300 | -0.65979900 | 0.44910200  |
| H | -2.48741300 | -1.26308200 | -0.25321000 |
| H | -2.43022700 | -0.98768700 | 1.32785500  |
| O | -0.83350300 | -2.36346800 | 4.14908700  |
| H | -0.80272100 | -2.61192600 | 5.08328900  |
| H | 0.00876000  | -2.70775000 | 3.72353700  |
| O | -2.40260100 | 1.44235800  | 3.00922100  |

|    |             |             |             |
|----|-------------|-------------|-------------|
| H  | -2.15885000 | 1.62431100  | 2.07865700  |
| H  | -2.79846900 | 0.54513100  | 2.99761100  |
| O  | -2.94306600 | -1.31669500 | 2.90478600  |
| H  | -2.22354800 | -1.80105200 | 3.39359000  |
| H  | -3.75062600 | -1.84249000 | 2.99088300  |
| O  | -2.84324300 | -2.30817800 | -1.50020200 |
| H  | -1.86357000 | -2.35947400 | -1.61488100 |
| H  | -3.06965400 | -1.72582700 | -2.25581000 |
| O  | -2.27197400 | -0.63568700 | -3.60632100 |
| H  | -2.59023100 | -0.25069100 | -4.43559600 |
| H  | -1.53062300 | -1.25374900 | -3.84801500 |
| O  | -2.16300200 | 3.31962300  | -2.04821900 |
| H  | -1.75704000 | 3.88068900  | -2.72558500 |
| H  | -1.93737300 | 3.76613600  | -1.19202600 |
| Gd | 0.17435900  | 0.09317100  | 0.17999200  |

E = -1996.120215 Hartree

Zero-point correction = 0.526972 Hartree/particle

Sum of electronic and thermal Energies = -1995.549678 Hartree

Sum of electronic and thermal Enthalpies = -1995.548864 Hartree

Sum of electronic and thermal Free Energies = -1995.671715 Hartree

**Table S29:** Cartesian coordinates (Å) of [Gd(cbda)(H<sub>2</sub>O)<sub>3</sub>].6H<sub>2</sub>O complex, corresponding to Gd-O47(w) bond optimized at TPSSh/LCRECP/6-31G(d,p), aqueous solution (1 Imaginary Frequency).

| Atoms | X           | Y           | Z           |
|-------|-------------|-------------|-------------|
| N     | 3.08250900  | -0.19292300 | 1.23942700  |
| C     | 3.92839300  | 0.37936000  | 0.16595200  |
| H     | 5.00022200  | 0.24687400  | 0.36803900  |
| H     | 3.74035500  | 1.45911300  | 0.13595400  |
| C     | 3.38436800  | -1.64630400 | 1.46631900  |
| C     | 2.11418000  | -2.28971300 | 2.05973600  |
| O     | 1.03601500  | -2.07126400 | 1.39366000  |
| O     | 2.17822700  | -2.97158200 | 3.10510100  |
| N     | 1.49464800  | 2.02996500  | 1.67384800  |
| C     | 2.66282900  | 1.96850400  | 2.33357700  |
| C     | -0.49453000 | 3.16189400  | 0.92921200  |
| O     | -0.99578200 | 1.98034900  | 0.82694500  |
| O     | -1.04763100 | 4.22052000  | 0.56162600  |
| O     | -0.11448800 | -1.71161400 | -1.37392800 |
| N     | 2.29583400  | -0.61345600 | -1.31851100 |
| C     | 3.57488300  | -0.22855400 | -1.16960600 |
| C     | 3.25957100  | 0.59038200  | 2.48066600  |
| H     | 2.73027500  | 0.06425500  | 3.28402100  |

**Electronic Supplementary Material (ESI) for RSC Advances. This journal is © The Royal Society of Chemistry 2022**

|    |             |             |             |
|----|-------------|-------------|-------------|
| H  | 4.31408800  | 0.67080900  | 2.77473300  |
| C  | 3.25914300  | 3.10590700  | 2.89028900  |
| C  | 2.62622200  | 4.34137400  | 2.74832100  |
| C  | 1.40578900  | 4.40249100  | 2.07411600  |
| C  | 0.86901100  | 3.21832700  | 1.57030800  |
| C  | 4.52297000  | -0.40711100 | -2.18374700 |
| C  | 4.12515400  | -0.99048900 | -3.38680300 |
| C  | 2.80252200  | -1.41339100 | -3.52996900 |
| C  | 1.92699500  | -1.22093600 | -2.46237700 |
| C  | 0.50261300  | -1.71411900 | -2.49930200 |
| O  | 0.02277200  | -2.07430900 | -3.60062000 |
| H  | 5.55118200  | -0.10107200 | -2.02347600 |
| H  | 4.84093800  | -1.13355600 | -4.18962900 |
| H  | 2.44120300  | -1.89675300 | -4.42955000 |
| H  | 4.20332800  | 3.01837800  | 3.41684300  |
| H  | 3.07609500  | 5.23870500  | 3.16035100  |
| H  | 0.86161900  | 5.32991600  | 1.94140500  |
| O  | -0.78619500 | 0.87540200  | -1.60247000 |
| H  | -1.30183600 | 0.29212300  | -2.21100300 |
| H  | -1.32656800 | 1.70889800  | -1.52044700 |
| O  | -0.34753600 | -0.13620500 | 2.74601600  |
| H  | -0.38210500 | -1.02069100 | 3.20887100  |
| H  | -1.18325000 | 0.36307200  | 2.96774700  |
| H  | 3.48557400  | -2.07993500 | 0.46599700  |
| C  | 4.65228000  | -1.94582700 | 2.26760400  |
| H  | 4.83972200  | -3.02198200 | 2.24130100  |
| H  | 5.52524800  | -1.44197800 | 1.84026400  |
| H  | 4.55042400  | -1.65510000 | 3.31578600  |
| O  | -2.73749700 | -1.70749400 | 0.95881200  |
| H  | -2.90304500 | -2.09139300 | 0.06614200  |
| H  | -3.51676700 | -1.16754200 | 1.18594900  |
| O  | -0.32402100 | -2.49531200 | 4.06468100  |
| H  | -0.16006600 | -2.29209500 | 4.99765700  |
| H  | 0.55204400  | -2.82144300 | 3.72357200  |
| O  | -2.54637600 | 1.38113400  | 3.02453500  |
| H  | -2.24280400 | 1.75393100  | 2.16961700  |
| H  | -3.36145200 | 0.88371300  | 2.79153500  |
| O  | -4.76229700 | -0.05048000 | 2.09428700  |
| H  | -5.31436900 | -0.52153900 | 2.73629800  |
| H  | -5.37854900 | 0.49223000  | 1.58011000  |
| O  | -2.69982400 | -2.80466200 | -1.54711500 |
| H  | -1.73362000 | -2.62185500 | -1.49088500 |
| H  | -2.96653000 | -2.11742800 | -2.19037400 |
| O  | -2.27559400 | -0.73389400 | -3.33053800 |
| H  | -2.60467000 | -0.31249900 | -4.13765500 |
| H  | -1.51989100 | -1.31907500 | -3.60790900 |
| O  | -2.33253000 | 3.12178700  | -1.59043200 |
| H  | -2.01700000 | 3.67775300  | -2.31830400 |
| H  | -2.02283100 | 3.58945400  | -0.77317700 |
| Gd | 0.36226800  | -0.05090000 | 0.43259600  |



E = -1996.118593 Hartree

Zero-point correction = 0.525138 Hartree/particle

Sum of electronic and thermal Energies = -1995.548325 Hartree

Sum of electronic and thermal Enthalpies = -1995.547381 Hartree

Sum of electronic and thermal Free Energies = -1995.670645 Hartree

**Table S30:** Cartesian coordinates (Å) of [Gd(peada)(H<sub>2</sub>O)<sub>2</sub>].4H<sub>2</sub>O complex, corresponding to Gd-O40(w) bond optimized at TPSSh/LCRECP/6-31G(d,p), aqueous solution (1 Imaginary Frequency).

| Atoms | X           | Y           | Z           |
|-------|-------------|-------------|-------------|
| N     | -0.34875000 | -2.46773100 | 0.58622000  |
| N     | 2.38404500  | -1.37382700 | 0.03968900  |
| C     | 0.88532200  | -3.00599400 | 1.20829100  |
| C     | 2.08816400  | -2.80784100 | 0.28600900  |
| C     | -0.70009400 | -3.25879300 | -0.62462400 |
| C     | 3.19864400  | -0.80855700 | 1.13992100  |
| C     | -0.17939200 | -2.65467400 | -1.93802000 |
| C     | 2.37666600  | -0.28122300 | 2.32095200  |
| O     | -0.02298800 | -3.40944900 | -2.90982800 |
| O     | 2.93293800  | -0.11572500 | 3.41278500  |
| O     | 1.14185100  | 0.03308000  | 2.05535200  |
| O     | 0.01018000  | -1.37739500 | -1.92810500 |
| C     | 3.08073300  | -1.16981600 | -1.25270700 |
| C     | 3.00098800  | 0.31586500  | -1.63639100 |
| C     | -1.48080700 | -2.47745800 | 1.54304500  |
| O     | 4.02623400  | 0.89831300  | -2.05722400 |
| O     | 1.85278000  | 0.87150600  | -1.48384900 |
| C     | -2.65736300 | -1.74371300 | 0.92866900  |
| C     | -3.99307400 | -2.08419200 | 1.16829700  |
| C     | -4.99939700 | -1.33295400 | 0.55634200  |
| C     | -4.64994000 | -0.26309800 | -0.27028000 |
| C     | -3.29490100 | 0.00858100  | -0.46235400 |
| N     | -2.33027400 | -0.72235300 | 0.12018300  |
| H     | -6.04259600 | -1.58132100 | 0.72268600  |
| H     | -4.23505700 | -2.92207800 | 1.81330500  |
| H     | -5.39104400 | 0.35822100  | -0.75868200 |
| C     | -2.81725900 | 1.19727600  | -1.27448800 |
| O     | -3.65796000 | 2.04149800  | -1.64693300 |
| O     | -1.54264300 | 1.26911200  | -1.46130100 |
| H     | 1.03483200  | -2.49185800 | 2.16017500  |
| H     | 0.77596200  | -4.08103500 | 1.41912700  |
| H     | 2.96062400  | -3.31575400 | 0.72200500  |
| H     | 1.89350300  | -3.28532300 | -0.67808600 |

|    |             |             |             |
|----|-------------|-------------|-------------|
| H  | 4.12753700  | -1.49743000 | -1.21853500 |
| H  | 2.54895500  | -1.74186100 | -2.01827600 |
| H  | 3.94651100  | -1.52764900 | 1.49928200  |
| H  | 3.74862900  | 0.05647500  | 0.75100300  |
| H  | -1.77202600 | -3.49767300 | 1.82942500  |
| H  | -1.15781500 | -1.95522900 | 2.45180200  |
| O  | 1.37441400  | 3.15445100  | 0.44637900  |
| H  | 0.70907700  | 3.43376500  | -0.22875200 |
| H  | 2.24767200  | 3.18719800  | -0.01830700 |
| O  | -1.20407700 | 1.50475900  | 1.50134000  |
| H  | -0.61192500 | 1.99693500  | 2.13767200  |
| H  | -1.94046900 | 2.12130000  | 1.26276900  |
| H  | -1.79007800 | -3.29234400 | -0.71777700 |
| H  | -0.35594100 | -4.29583100 | -0.52869400 |
| O  | 3.77637300  | 3.35329700  | -0.89697500 |
| H  | 4.49420700  | 3.27196800  | -0.25201700 |
| H  | 3.84459200  | 2.52031000  | -1.43484400 |
| O  | 0.69937400  | 2.63759900  | 2.98915800  |
| H  | 1.02924800  | 1.71414100  | 3.00935600  |
| H  | 1.05522500  | 2.96192400  | 2.12041300  |
| O  | -3.27258400 | 3.23699700  | 0.90675900  |
| H  | -3.56092800 | 3.02843900  | -0.00664100 |
| H  | -4.02426900 | 2.97991600  | 1.46134700  |
| O  | -0.49021500 | 3.78890100  | -1.48173800 |
| H  | -0.92974300 | 2.90938600  | -1.59901500 |
| H  | -0.02459500 | 3.94492900  | -2.31633200 |
| Gd | 0.11145900  | 0.09187700  | -0.09164000 |

E = -1841.785306 Hartree

Zero-point correction = 0.457987 Hartree/particle

Sum of electronic and thermal Energies = -1841.288869 Hartree

Sum of electronic and thermal Enthalpies = -1841.287925 Hartree

Sum of electronic and thermal Free Energies = -1841.397226 Hartree

**Table S31:** Cartesian coordinates (Å) of [Gd(peada)(H<sub>2</sub>O)<sub>2</sub>]<sup>-</sup>.4H<sub>2</sub>O complex, corresponding to Gd-O43(w) bond optimized at TPSSh/LCRECP/6-31G(d,p), aqueous solution (1 Imaginary Frequency).

| Atoms | X           | Y           | Z           |
|-------|-------------|-------------|-------------|
| N     | -0.24500500 | -2.45498300 | 0.53957000  |
| N     | 2.50789000  | -1.43486100 | -0.01320300 |
| C     | 0.97570200  | -3.02882000 | 1.15303800  |
| C     | 2.18105000  | -2.86123500 | 0.23239600  |
| C     | -0.64487500 | -3.24709500 | -0.65414300 |
| C     | 3.27565800  | -0.86940300 | 1.12166200  |

|   |             |             |             |
|---|-------------|-------------|-------------|
| C | -0.12586400 | -2.68309100 | -1.98612900 |
| C | 2.40114000  | -0.34120100 | 2.26548300  |
| O | -0.00337200 | -3.45765000 | -2.94543500 |
| O | 2.87983300  | -0.24366900 | 3.39887100  |
| O | 1.20208900  | 0.04152800  | 1.92146400  |
| O | 0.09440100  | -1.40797700 | -2.00857800 |
| C | 3.27479600  | -1.26798900 | -1.27202700 |
| C | 3.21924700  | 0.21067800  | -1.67654100 |
| C | -1.35138800 | -2.41877300 | 1.52305100  |
| O | 4.27324900  | 0.83200300  | -1.94244000 |
| O | 2.04564700  | 0.73311000  | -1.67712000 |
| C | -2.51946800 | -1.65003700 | 0.94369700  |
| C | -3.85438500 | -1.95957800 | 1.22765400  |
| C | -4.86300600 | -1.17356600 | 0.66779500  |
| C | -4.51333100 | -0.09674800 | -0.14924300 |
| C | -3.15978800 | 0.14208500  | -0.38499300 |
| N | -2.19083300 | -0.62613000 | 0.13955300  |
| H | -5.90573300 | -1.39816200 | 0.86746600  |
| H | -4.09233300 | -2.80174200 | 1.86854800  |
| H | -5.25360600 | 0.55426000  | -0.59859300 |
| C | -2.68930100 | 1.33200600  | -1.19037100 |
| O | -3.52116300 | 2.19710300  | -1.53212000 |
| O | -1.42093200 | 1.38325400  | -1.43000800 |
| H | 1.14220100  | -2.52665000 | 2.10875400  |
| H | 0.83796500  | -4.10114400 | 1.36179600  |
| H | 3.04253100  | -3.38850300 | 0.66800600  |
| H | 1.97435100  | -3.33190200 | -0.73264100 |
| H | 4.31424300  | -1.60538600 | -1.17374000 |
| H | 2.77606200  | -1.85270200 | -2.05002000 |
| H | 4.00444200  | -1.59010200 | 1.51485900  |
| H | 3.84209100  | -0.00516700 | 0.75467400  |
| H | -1.66805600 | -3.42611400 | 1.82830400  |
| H | -0.98517200 | -1.89832200 | 2.41617500  |
| O | 0.98676400  | 2.56818000  | 0.10556500  |
| H | 0.45733500  | 3.16809200  | -0.49230600 |
| H | 1.93594500  | 2.70758300  | -0.17966000 |
| O | -1.80783700 | 1.63970200  | 2.04091700  |
| H | -1.03440500 | 2.12085000  | 2.41628100  |
| H | -2.41680100 | 2.33181700  | 1.70180300  |
| H | -1.73703400 | -3.23712900 | -0.72968100 |
| H | -0.34092000 | -4.29616400 | -0.55157000 |
| O | 3.51164700  | 3.14664800  | -0.68523900 |
| H | 4.13078700  | 3.14815500  | 0.05946100  |
| H | 3.81476200  | 2.39409500  | -1.25841400 |
| O | 0.64558400  | 2.61188600  | 2.84017300  |
| H | 0.88689500  | 1.65940700  | 2.83054400  |
| H | 0.81216100  | 2.83281200  | 1.89450800  |
| O | -3.68404300 | 3.48900500  | 0.96793300  |
| H | -3.74790800 | 3.15785700  | 0.04617400  |
| H | -4.51199200 | 3.19973200  | 1.37915000  |

|    |             |            |             |
|----|-------------|------------|-------------|
| O  | -0.53414100 | 3.91824500 | -1.64300700 |
| H  | -0.99406700 | 3.04975000 | -1.77416800 |
| H  | -0.02698500 | 4.05891100 | -2.45644500 |
| Gd | 0.27581600  | 0.10108200 | -0.24014300 |

E = -1841.780614 Hartree

Zero-point correction = 0.457826 Hartree/particle

Sum of electronic and thermal Energies = -1841.284112 Hartree

Sum of electronic and thermal Enthalpies = -1841.283168 Hartree

Sum of electronic and thermal Free Energies = -1841.393598 Hartree

**Table S32:** Cartesian coordinates (Å) of [Gd(cbda)(H<sub>2</sub>O)<sub>3</sub>].6H<sub>2</sub>O complex, corresponding to Gd-O36(w) bond optimized at TPSSh/SCRECP/6-31G(d,p), aqueous solution (1 Imaginary Frequency).

| Atoms | X           | Y           | Z           |
|-------|-------------|-------------|-------------|
| N     | 2.87103100  | -0.29148200 | 1.35675300  |
| C     | 3.83972600  | 0.19465800  | 0.34408300  |
| H     | 4.87569400  | -0.04991700 | 0.61492200  |
| H     | 3.76784600  | 1.28790600  | 0.31492000  |
| C     | 3.06992000  | -1.75432000 | 1.64267700  |
| C     | 1.71805000  | -2.30978700 | 2.13301200  |
| O     | 0.71251600  | -2.03261300 | 1.38393100  |
| O     | 1.64894500  | -2.97563400 | 3.19088300  |
| N     | 1.41827400  | 2.02411600  | 1.52336400  |
| C     | 2.49421600  | 1.93456900  | 2.32150300  |
| C     | -0.46041200 | 3.16566100  | 0.56274500  |
| O     | -0.92547200 | 1.98239900  | 0.37522800  |
| O     | -0.99607000 | 4.23415600  | 0.19591000  |
| O     | -0.25897700 | -1.42496600 | -1.44772000 |
| N     | 2.21511200  | -0.60962000 | -1.25318600 |
| C     | 3.51283400  | -0.35042300 | -1.02306800 |
| C     | 2.99584300  | 0.53399200  | 2.58003400  |
| H     | 2.35997800  | 0.08556700  | 3.35197800  |
| H     | 4.02524100  | 0.56332400  | 2.95932600  |
| C     | 3.05930500  | 3.06569300  | 2.92135600  |
| C     | 2.48365300  | 4.31561400  | 2.68488500  |
| C     | 1.34451500  | 4.39896200  | 1.88206900  |
| C     | 0.83562300  | 3.22135600  | 1.33563200  |
| C     | 4.49336200  | -0.57434400 | -1.99706300 |
| C     | 4.10767500  | -1.06347100 | -3.24507700 |
| C     | 2.76040600  | -1.35054300 | -3.47517900 |
| C     | 1.85224700  | -1.12513300 | -2.44348900 |
| C     | 0.39488800  | -1.48923700 | -2.55132900 |

**Electronic Supplementary Material (ESI) for RSC Advances. This journal is © The Royal Society of Chemistry 2022**

|    |             |             |             |
|----|-------------|-------------|-------------|
| O  | -0.06505800 | -1.83625900 | -3.66212900 |
| H  | 5.53529900  | -0.37280800 | -1.77318100 |
| H  | 4.84929200  | -1.23813800 | -4.01761000 |
| H  | 2.40508000  | -1.75649200 | -4.41456900 |
| H  | 3.93216600  | 2.96376600  | 3.55706600  |
| H  | 2.91155200  | 5.20767700  | 3.13062500  |
| H  | 0.84124100  | 5.33783700  | 1.68432200  |
| O  | -0.75837200 | 1.32099500  | -2.54745000 |
| H  | -1.40215200 | 0.68245800  | -2.91209800 |
| H  | -1.32384200 | 2.07905700  | -2.27714600 |
| O  | -0.19668200 | 0.16374100  | 2.75050500  |
| H  | -0.36161300 | -0.66060000 | 3.27087000  |
| H  | -0.98254100 | 0.75492700  | 2.90496500  |
| H  | 3.23316200  | -2.21640400 | 0.66267100  |
| C  | 4.24082900  | -2.10122100 | 2.56188300  |
| H  | 4.36030200  | -3.18709400 | 2.58644500  |
| H  | 5.17803200  | -1.66748000 | 2.19944600  |
| H  | 4.06470400  | -1.76559800 | 3.58648200  |
| O  | -1.96897900 | -0.65157800 | 0.60959500  |
| H  | -2.41661200 | -1.15173500 | -0.13177500 |
| H  | -2.33268000 | -1.02211000 | 1.45259100  |
| O  | -0.71194100 | -2.18627900 | 4.10875700  |
| H  | -0.56686600 | -2.10261000 | 5.06236400  |
| H  | 0.08961400  | -2.66932200 | 3.74487000  |
| O  | -2.56641300 | 1.42933600  | 2.73933600  |
| H  | -2.43269900 | 1.50195700  | 1.77355300  |
| H  | -3.00555400 | 0.56255100  | 2.86098300  |
| O  | -3.01858700 | -1.37208500 | 2.98556000  |
| H  | -2.28268500 | -1.82567800 | 3.46733800  |
| H  | -3.75897900 | -1.99407500 | 2.95048000  |
| O  | -2.86529000 | -2.21370000 | -1.35524900 |
| H  | -1.88815500 | -2.27753000 | -1.45888000 |
| H  | -3.08086300 | -1.67283700 | -2.14876400 |
| O  | -2.51175700 | -0.72954600 | -3.62141000 |
| H  | -2.93376200 | -0.64871900 | -4.48851600 |
| H  | -1.67897400 | -1.25592100 | -3.76505100 |
| O  | -2.46662800 | 3.51076400  | -1.97889800 |
| H  | -2.14927700 | 4.16413300  | -2.61950400 |
| H  | -2.04707000 | 3.79570300  | -1.12630000 |
| Gd | 0.31865600  | -0.02542800 | 0.40072300  |

E = -2725.557573 Hartree

Zero-point correction = 0.527198 Hartree/particle

Sum of electronic and thermal Energies = -2724.986319 Hartree

Sum of electronic and thermal Enthalpies = -2724.985375 Hartree

Sum of electronic and thermal Free Energies = -2725.106814 Hartree

**Table S33:** Cartesian coordinates (Å) of [Gd(cbda)(H<sub>2</sub>O)<sub>3</sub>].6H<sub>2</sub>O complex, corresponding to Gd-O39(w) bond optimized at TPSSh/SCRECP/6-31G(d,p), aqueous solution (1 Imaginary Frequency).

| Atoms | X           | Y           | Z           |
|-------|-------------|-------------|-------------|
| N     | 2.77720800  | -0.20113000 | 1.22221700  |
| C     | 3.75006600  | 0.28689200  | 0.21681300  |
| H     | 4.78918500  | 0.07691900  | 0.50578200  |
| H     | 3.64772200  | 1.37751300  | 0.16640500  |
| C     | 2.92218800  | -1.66756200 | 1.49782800  |
| C     | 1.57766800  | -2.14995200 | 2.07898600  |
| O     | 0.53017700  | -1.76771700 | 1.44461800  |
| O     | 1.55825400  | -2.87802100 | 3.09720200  |
| N     | 1.28875900  | 2.08589400  | 1.52580400  |
| C     | 2.40299100  | 1.98739900  | 2.26819300  |
| C     | -0.61448600 | 3.25011000  | 0.66058200  |
| O     | -1.08940400 | 2.07058300  | 0.46921100  |
| O     | -1.14414300 | 4.31835200  | 0.28240400  |
| O     | -0.23098200 | -1.64332400 | -1.46833600 |
| N     | 2.17371800  | -0.63810200 | -1.35514700 |
| C     | 3.45682800  | -0.30705200 | -1.13670200 |
| C     | 2.92692800  | 0.58972800  | 2.46312300  |
| H     | 2.30362400  | 0.12531500  | 3.23498700  |
| H     | 3.96645100  | 0.61488500  | 2.81505500  |
| C     | 2.98256900  | 3.10362400  | 2.88272800  |
| C     | 2.38390600  | 4.35401200  | 2.72250200  |
| C     | 1.21125800  | 4.45062400  | 1.97155800  |
| C     | 0.69281000  | 3.28639300  | 1.40657900  |
| C     | 4.45089500  | -0.53490700 | -2.09573200 |
| C     | 4.09518200  | -1.11679200 | -3.31250300 |
| C     | 2.76788000  | -1.49936500 | -3.51993500 |
| C     | 1.84605300  | -1.25912800 | -2.50380000 |
| C     | 0.41553500  | -1.72220800 | -2.57542500 |
| O     | -0.03927100 | -2.13308000 | -3.66856300 |
| H     | 5.48059200  | -0.26896100 | -1.88252300 |
| H     | 4.84679700  | -1.29521900 | -4.07445800 |
| H     | 2.44025700  | -1.99010500 | -4.42841800 |
| H     | 3.88533100  | 2.98748900  | 3.47279200  |
| H     | 2.82096900  | 5.23438800  | 3.18246800  |
| H     | 0.69136400  | 5.38976900  | 1.82428300  |
| O     | -0.58705500 | 0.97389100  | -1.92257200 |
| H     | -1.16270200 | 0.41068600  | -2.49376100 |
| H     | -1.04770600 | 1.85741400  | -1.90989400 |
| O     | -0.01697500 | 0.40624500  | 3.51074700  |
| H     | -0.26165900 | -0.48307400 | 3.83749400  |
| H     | -0.88107900 | 0.86009000  | 3.38048000  |
| H     | 3.00069900  | -2.14522300 | 0.51510800  |

|    |             |             |             |
|----|-------------|-------------|-------------|
| C  | 4.12859600  | -2.07356600 | 2.34577400  |
| H  | 4.18748700  | -3.16405900 | 2.37689800  |
| H  | 5.06294300  | -1.69702200 | 1.91775400  |
| H  | 4.04013400  | -1.71846800 | 3.37519300  |
| O  | -2.01038800 | -0.61580700 | 0.50002000  |
| H  | -2.44721800 | -1.15424600 | -0.22129200 |
| H  | -2.29311400 | -1.02465900 | 1.36036400  |
| O  | -0.77095800 | -2.27892000 | 4.20847200  |
| H  | -0.74776900 | -2.56124300 | 5.13302800  |
| H  | 0.04621000  | -2.65410200 | 3.76209000  |
| O  | -2.56487300 | 1.38012400  | 2.87300500  |
| H  | -2.31022300 | 1.51972100  | 1.93872100  |
| H  | -2.90282300 | 0.46092400  | 2.90103800  |
| O  | -2.89732900 | -1.42455800 | 2.88820400  |
| H  | -2.16529600 | -1.85515000 | 3.41044200  |
| H  | -3.64335100 | -2.04018200 | 2.87982100  |
| O  | -2.88828800 | -2.21722800 | -1.43400600 |
| H  | -1.91206400 | -2.33555200 | -1.52061400 |
| H  | -3.05885200 | -1.63459400 | -2.20437900 |
| O  | -2.23346400 | -0.59580200 | -3.54694300 |
| H  | -2.53358000 | -0.20016900 | -4.37786100 |
| H  | -1.53649500 | -1.26248400 | -3.78557200 |
| O  | -1.97733900 | 3.31243900  | -2.11702500 |
| H  | -1.48141300 | 3.89166600  | -2.71455000 |
| H  | -1.85822700 | 3.72995400  | -1.22605000 |
| Gd | 0.22514500  | 0.09103300  | 0.19169200  |

E = -2725.554928 Hartree

Zero-point correction = 0.527388 Hartree/particle

Sum of electronic and thermal Energies = -2724.983888 Hartree

Sum of electronic and thermal Enthalpies = -2724.982944 Hartree

Sum of electronic and thermal Free Energies = -2725.104848 Hartree

**Table S34:** Cartesian coordinates (Å) of [Gd(cbda)(H<sub>2</sub>O)<sub>3</sub>].6H<sub>2</sub>O complex, corresponding to Gd-O47(w) bond optimized at TPSSh/SCRECP/6-31G(d,p), aqueous solution (1 Imaginary Frequency).

| Atoms | X          | Y           | Z          |
|-------|------------|-------------|------------|
| N     | 2.91378600 | -0.13385700 | 1.22054500 |
| C     | 3.82068600 | 0.33565400  | 0.14431800 |
| H     | 4.87821900 | 0.16610000  | 0.38850700 |
| H     | 3.68176600 | 1.41843300  | 0.04104000 |
| C     | 3.12554800 | -1.59328100 | 1.51633500 |
| C     | 1.79248100 | -2.13907900 | 2.05731500 |

**Electronic Supplementary Material (ESI) for RSC Advances. This journal is © The Royal Society of Chemistry 2022**

|   |             |             |             |
|---|-------------|-------------|-------------|
| O | 0.75867000  | -1.81932300 | 1.37131300  |
| O | 1.76703500  | -2.84718900 | 3.09123300  |
| N | 1.40800200  | 2.15138700  | 1.54769900  |
| C | 2.53614400  | 2.06997600  | 2.26988600  |
| C | -0.52298500 | 3.29141600  | 0.68560800  |
| O | -0.95303800 | 2.11641600  | 0.41911200  |
| O | -1.06940800 | 4.36778700  | 0.34755600  |
| O | -0.32892000 | -1.52473500 | -1.32652800 |
| N | 2.16912900  | -0.67476600 | -1.29498400 |
| C | 3.46577000  | -0.35073400 | -1.15327900 |
| C | 3.10553700  | 0.68308900  | 2.43866300  |
| H | 2.55831500  | 0.19266400  | 3.25308800  |
| H | 4.15983100  | 0.74083400  | 2.73807200  |
| C | 3.09631500  | 3.19057700  | 2.89405600  |
| C | 2.45817800  | 4.42513500  | 2.76594900  |
| C | 1.27203000  | 4.50223100  | 2.03395900  |
| C | 0.77638300  | 3.33655900  | 1.45214400  |
| C | 4.41555600  | -0.66868200 | -2.13026900 |
| C | 4.00125200  | -1.34103500 | -3.28084000 |
| C | 2.65949600  | -1.70480400 | -3.40942600 |
| C | 1.77978600  | -1.36189200 | -2.38420800 |
| C | 0.32191400  | -1.74551900 | -2.41316800 |
| O | -0.15615400 | -2.21449800 | -3.47156300 |
| H | 5.45665200  | -0.40390900 | -1.98119800 |
| H | 4.71870600  | -1.59621800 | -4.05378800 |
| H | 2.28506100  | -2.24986300 | -4.26738700 |
| H | 4.01308800  | 3.09120300  | 3.46512000  |
| H | 2.87812300  | 5.30974700  | 3.23360800  |
| H | 0.72680700  | 5.42988800  | 1.90726800  |
| O | -0.23105900 | 1.10204900  | -1.94345600 |
| H | -0.87597900 | 0.58462800  | -2.48116400 |
| H | -0.61797100 | 2.01807300  | -1.95117700 |
| O | -0.54395100 | 0.22441400  | 2.50281500  |
| H | -0.51977600 | -0.61269200 | 3.02624600  |
| H | -1.44320300 | 0.62350200  | 2.66716700  |
| H | 3.25302500  | -2.07320200 | 0.54081200  |
| C | 4.33382400  | -1.93235300 | 2.38973200  |
| H | 4.44903100  | -3.01838700 | 2.42082500  |
| H | 5.25549900  | -1.50738200 | 1.97963100  |
| H | 4.20793800  | -1.58520200 | 3.41791100  |
| O | -3.04959100 | -0.66252600 | 0.73081100  |
| H | -3.21563500 | -1.12469300 | -0.12853100 |
| H | -3.08504800 | -1.34742500 | 1.42903900  |
| O | -0.59749500 | -2.10740800 | 4.03013400  |
| H | -0.41272400 | -1.91893800 | 4.96155500  |
| H | 0.22391500  | -2.55919500 | 3.66995400  |
| O | -3.12973300 | 0.90013300  | 2.89672300  |
| H | -3.28399400 | 0.65712100  | 1.95426100  |
| H | -3.30769100 | 0.03471500  | 3.32533700  |
| O | -3.16392200 | -1.87717200 | 3.24343000  |



|    |             |             |             |
|----|-------------|-------------|-------------|
| H  | -2.26448200 | -2.13198300 | 3.56470000  |
| H  | -3.77986500 | -2.53139400 | 3.60034200  |
| O  | -3.06178700 | -2.03534200 | -1.59969700 |
| H  | -2.08332400 | -2.06525200 | -1.47805000 |
| H  | -3.12532100 | -1.38299500 | -2.32660300 |
| O  | -2.08302300 | -0.31778200 | -3.54043200 |
| H  | -2.28789900 | 0.08370800  | -4.39729900 |
| H  | -1.49303000 | -1.09020300 | -3.73089000 |
| O  | -1.50540900 | 3.51739400  | -2.21261400 |
| H  | -0.92245700 | 4.13368100  | -2.68015700 |
| H  | -1.54095300 | 3.87710400  | -1.29033200 |
| Gd | 0.33419100  | 0.15544200  | 0.28522100  |

E = -2725.549625 Hartree

Zero-point correction = 0.527535 Hartree/particle

Sum of electronic and thermal Energies = -2724.978198 Hartree

Sum of electronic and thermal Enthalpies = -2724.977254 Hartree

Sum of electronic and thermal Free Energies = -2725.098641 Hartree

**Table S35:** Cartesian coordinates (Å) of [Gd(peada)(H<sub>2</sub>O)<sub>2</sub>].4H<sub>2</sub>O complex, corresponding to Gd-O43(w) bond optimized at TPSSh/SCRECP/6-31G(d,p), aqueous solution (1 Imaginary Frequency).

| Atoms | X           | Y           | Z           |
|-------|-------------|-------------|-------------|
| N     | -0.24826300 | -2.55373600 | 0.46464800  |
| N     | 2.47051100  | -1.41634500 | -0.00215100 |
| C     | 0.98342600  | -3.10122300 | 1.08345400  |
| C     | 2.19972400  | -2.86192400 | 0.19783100  |
| C     | -0.66268800 | -3.37195000 | -0.70524600 |
| C     | 3.11257300  | -0.81015100 | 1.19537200  |
| C     | -0.18330300 | -2.81498500 | -2.05449100 |
| C     | 2.11468700  | -0.17980300 | 2.18095600  |
| O     | -0.17291200 | -3.57120300 | -3.03499200 |
| O     | 2.55417500  | 0.33050800  | 3.22736000  |
| O     | 0.87721100  | -0.16987500 | 1.81803600  |
| O     | 0.13158200  | -1.55918900 | -2.06160100 |
| C     | 3.31700400  | -1.20058400 | -1.20297000 |
| C     | 3.16714300  | 0.25882200  | -1.64685500 |
| C     | -1.33451500 | -2.49620700 | 1.46970400  |
| O     | 4.18163600  | 0.94906000  | -1.89771800 |
| O     | 1.95836500  | 0.68596300  | -1.70499400 |
| C     | -2.50261300 | -1.71302400 | 0.91644400  |
| C     | -3.83670500 | -1.98310000 | 1.24108100  |
| C     | -4.83747600 | -1.16130100 | 0.71925800  |
| C     | -4.48158900 | -0.08899800 | -0.10155800 |
| C     | -3.13083700 | 0.10455300  | -0.38555900 |

**Electronic Supplementary Material (ESI) for RSC Advances. This journal is © The Royal Society of Chemistry 2022**

|    |             |             |             |
|----|-------------|-------------|-------------|
| N  | -2.17042500 | -0.69773100 | 0.10286300  |
| H  | -5.87949500 | -1.35361500 | 0.95356000  |
| H  | -4.08022900 | -2.81993400 | 1.88666400  |
| H  | -5.21509500 | 0.59128900  | -0.51727700 |
| C  | -2.63549700 | 1.27498600  | -1.20175700 |
| O  | -3.43288800 | 2.19035900  | -1.49285900 |
| O  | -1.38112400 | 1.25377900  | -1.50440300 |
| H  | 1.11542000  | -2.61372300 | 2.05123400  |
| H  | 0.88000400  | -4.18217500 | 1.26307400  |
| H  | 3.07313100  | -3.36393200 | 0.64000200  |
| H  | 2.03471300  | -3.30934200 | -0.78610800 |
| H  | 4.36910200  | -1.45354200 | -1.02432100 |
| H  | 2.92661600  | -1.83382200 | -2.00490800 |
| H  | 3.74765000  | -1.53492800 | 1.72243100  |
| H  | 3.77107100  | 0.00002600  | 0.86409700  |
| H  | -1.65529100 | -3.49609600 | 1.79410400  |
| H  | -0.94101900 | -1.96384400 | 2.34345500  |
| O  | 0.85857400  | 2.34626500  | 0.20119400  |
| H  | 0.27080900  | 2.98120700  | -0.29066900 |
| H  | 1.76475500  | 2.58164500  | -0.15189400 |
| O  | -1.72559400 | 1.68342500  | 2.00822400  |
| H  | -0.89879900 | 2.00005700  | 2.43277600  |
| H  | -2.15189600 | 2.48651000  | 1.64423700  |
| H  | -1.75666200 | -3.38373100 | -0.75349600 |
| H  | -0.33928600 | -4.41477400 | -0.59720100 |
| O  | 3.21688500  | 3.24885700  | -0.80161500 |
| H  | 3.85586100  | 3.36141900  | -0.08245000 |
| H  | 3.58546600  | 2.49818600  | -1.33910200 |
| O  | 0.77436000  | 2.64524800  | 2.96829900  |
| H  | 1.25203500  | 1.83052600  | 3.23305600  |
| H  | 0.88721100  | 2.63945100  | 1.98878300  |
| O  | -3.24579800 | 3.81615900  | 0.80184200  |
| H  | -3.35628400 | 3.37576200  | -0.06848800 |
| H  | -4.08454700 | 3.64135000  | 1.25377500  |
| O  | -0.58208100 | 3.85078000  | -1.53507600 |
| H  | -0.99153600 | 2.98231600  | -1.77355900 |
| H  | 0.10361800  | 3.98786900  | -2.20630400 |
| Gd | 0.23766400  | -0.07375400 | -0.36084500 |

E = -2571.207447 Hartree

Zero-point correction = 0.458374 Hartree/particle

Sum of electronic and thermal Energies = -2570.710493 Hartree

Sum of electronic and thermal Enthalpies = -2570.709549 Hartree

Sum of electronic and thermal Free Energies = -2570.821214 Hartree

**Table S36:** Cartesian coordinates (Å) of [Gd(peada)(H<sub>2</sub>O)<sub>2</sub>].4H<sub>2</sub>O complex, corresponding to Gd-O40(w) bond optimized at TPSSh/SCRECP/6-31G(d,p), aqueous solution (1 Imaginary Frequency).

| Atoms | X           | Y           | Z           |
|-------|-------------|-------------|-------------|
| N     | -0.33604500 | -2.43598500 | 0.74901100  |
| N     | 2.30464900  | -1.27107700 | -0.00073700 |
| C     | 0.94073900  | -2.91729500 | 1.33227200  |
| C     | 2.09768700  | -2.70078500 | 0.35859900  |
| C     | -0.76292400 | -3.31150800 | -0.37550700 |
| C     | 3.09631900  | -0.55154400 | 1.03008100  |
| C     | -0.39879600 | -2.75800100 | -1.76129100 |
| C     | 2.23443400  | 0.02568900  | 2.16403800  |
| O     | -0.40730600 | -3.53826200 | -2.72584700 |
| O     | 2.80363300  | 0.58989200  | 3.11764500  |
| O     | 0.95935400  | -0.06521000 | 2.01232500  |
| O     | -0.14954800 | -1.49298600 | -1.80734400 |
| C     | 2.96273600  | -1.15426300 | -1.32550200 |
| C     | 2.77257500  | 0.25916900  | -1.89030700 |
| C     | -1.39976500 | -2.36217900 | 1.77890700  |
| O     | 3.72836500  | 0.82568600  | -2.46399700 |
| O     | 1.60276600  | 0.76720600  | -1.72055000 |
| C     | -2.60807500 | -1.65879400 | 1.19458300  |
| C     | -3.93141000 | -1.96291000 | 1.53132000  |
| C     | -4.96106800 | -1.21627800 | 0.95286000  |
| C     | -4.64701800 | -0.18160000 | 0.06858700  |
| C     | -3.30356400 | 0.05209500  | -0.22422400 |
| N     | -2.31879300 | -0.68229200 | 0.31956900  |
| H     | -5.99567400 | -1.43693500 | 1.19507500  |
| H     | -4.14668400 | -2.76682300 | 2.22687500  |
| H     | -5.40778000 | 0.44129900  | -0.38643300 |
| C     | -2.83876400 | 1.20597600  | -1.09002900 |
| O     | -3.66427100 | 2.09058000  | -1.40259200 |
| O     | -1.58360000 | 1.21247700  | -1.37277100 |
| H     | 1.10928800  | -2.37497900 | 2.26269300  |
| H     | 0.87900200  | -3.99120500 | 1.56643800  |
| H     | 3.01533000  | -3.12719500 | 0.78903200  |
| H     | 1.89665900  | -3.24663100 | -0.56736800 |
| H     | 4.03017300  | -1.40308100 | -1.28437200 |
| H     | 2.46188000  | -1.84499300 | -2.01004400 |
| H     | 3.89168500  | -1.18470000 | 1.44674900  |
| H     | 3.58795600  | 0.30371200  | 0.55413600  |
| H     | -1.67611000 | -3.35300900 | 2.16521000  |
| H     | -1.00877000 | -1.76819100 | 2.61354300  |
| O     | 1.49789700  | 2.59281700  | 0.38370400  |
| H     | 0.96744800  | 3.01741200  | -0.33516000 |
| H     | 2.42492700  | 2.69069000  | 0.04722400  |

|    |             |             |             |
|----|-------------|-------------|-------------|
| O  | -1.03582200 | 1.65591700  | 1.39055800  |
| H  | -0.40275200 | 1.97218000  | 2.08723800  |
| H  | -1.46359300 | 2.46491900  | 1.01604800  |
| H  | -1.85367800 | -3.40388600 | -0.35739800 |
| H  | -0.35996300 | -4.32514500 | -0.26076700 |
| O  | 3.94074800  | 2.98990600  | -0.81573800 |
| H  | 4.72897800  | 2.75790500  | -0.30368800 |
| H  | 3.90945400  | 2.31562600  | -1.53909500 |
| O  | 0.89574700  | 2.76968100  | 3.01379500  |
| H  | 1.43572700  | 1.99484100  | 3.28390900  |
| H  | 1.22320200  | 2.92057800  | 2.09259400  |
| O  | -2.33274900 | 3.87364900  | 0.30638600  |
| H  | -2.84811600 | 3.44307400  | -0.41238800 |
| H  | -3.00334200 | 4.11958600  | 0.96098600  |
| O  | 0.27908400  | 3.18347800  | -2.01722300 |
| H  | -0.56794200 | 2.69660500  | -1.90954700 |
| H  | 0.89780100  | 2.44952800  | -2.22641300 |
| Gd | 0.05312500  | 0.02291200  | -0.10324700 |

E = -2571.216702 Hartree

Zero-point correction = 0.460896 Hartree/particle

Sum of electronic and thermal Energies = -2570.718522 Hartree

Sum of electronic and thermal Enthalpies = -2570.717578 Hartree

Sum of electronic and thermal Free Energies = -2570.824669 Hartree

**Table S37:** Cartesian coordinates (Å) of [Gd(cbda)(H<sub>2</sub>O)<sub>3</sub>].6H<sub>2</sub>O complex, optimized at TPSSH/SARC-ZORA/6-31G(d,p), aqueous solution (0 Imaginary Frequency).

| Atoms | X           | Y           | Z          |
|-------|-------------|-------------|------------|
| N     | 2.85851000  | -0.22740300 | 1.27704100 |
| C     | 3.80423200  | 0.26014500  | 0.24946000 |
| H     | 4.85119100  | 0.06285900  | 0.52193800 |
| H     | 3.69191800  | 1.34937900  | 0.19084800 |
| C     | 3.04186800  | -1.68782700 | 1.56125900 |
| C     | 1.68982400  | -2.23163700 | 2.06837500 |
| O     | 0.68301700  | -1.98482800 | 1.31180500 |
| O     | 1.62158200  | -2.87110000 | 3.14447100 |
| N     | 1.37009900  | 2.10314300  | 1.53990700 |
| C     | 2.48741800  | 1.99406100  | 2.27556900 |
| C     | -0.55441300 | 3.28476900  | 0.72354500 |
| O     | -1.08961400 | 2.12064200  | 0.61940000 |
| O     | -1.06159900 | 4.35571700  | 0.31965900 |

**Electronic Supplementary Material (ESI) for RSC Advances. This journal is © The Royal Society of Chemistry 2022**

|   |             |             |             |
|---|-------------|-------------|-------------|
| O | -0.22082500 | -1.64928200 | -1.51940800 |
| N | 2.21764400  | -0.66378300 | -1.32719000 |
| C | 3.50123700  | -0.34088400 | -1.10077600 |
| C | 2.99720900  | 0.59053100  | 2.49817200  |
| H | 2.38039500  | 0.12998200  | 3.27834000  |
| H | 4.03335100  | 0.62321800  | 2.86171500  |
| C | 3.09184300  | 3.11002700  | 2.86773700  |
| C | 2.51530100  | 4.36848400  | 2.68855500  |
| C | 1.33464300  | 4.47404700  | 1.95100400  |
| C | 0.78748300  | 3.30898500  | 1.41303400  |
| C | 4.49978700  | -0.56250500 | -2.05761100 |
| C | 4.14713700  | -1.11877300 | -3.28708700 |
| C | 2.81569500  | -1.47445500 | -3.51282000 |
| C | 1.88968900  | -1.24661500 | -2.49589400 |
| C | 0.44837000  | -1.67114700 | -2.61359300 |
| O | 0.00355900  | -2.00278300 | -3.73934500 |
| H | 5.53041900  | -0.30771800 | -1.83415200 |
| H | 4.90189800  | -1.29208500 | -4.04719000 |
| H | 2.48686000  | -1.93295100 | -4.43769000 |
| H | 3.99579300  | 2.98807000  | 3.45511800  |
| H | 2.97277100  | 5.24860100  | 3.12870400  |
| H | 0.82824900  | 5.42009100  | 1.80025800  |
| O | -0.76642900 | 1.00100000  | -1.85376200 |
| H | -1.29570600 | 0.42129200  | -2.45232400 |
| H | -1.29141900 | 1.84493200  | -1.78866600 |
| O | -0.25552800 | 0.16936100  | 2.74892900  |
| H | -0.43420900 | -0.68059000 | 3.21794100  |
| H | -1.02630900 | 0.76026800  | 2.95750300  |
| H | 3.18767400  | -2.15651900 | 0.58224000  |
| C | 4.22341200  | -2.04814200 | 2.46418400  |
| H | 4.33750200  | -3.13486500 | 2.48437700  |
| H | 5.15695700  | -1.61908900 | 2.08624900  |
| H | 4.06777800  | -1.71221000 | 3.49200100  |
| O | -2.12833300 | -0.70116600 | 0.49389100  |
| H | -2.50223300 | -1.30357900 | -0.21132100 |
| H | -2.50723000 | -0.99794400 | 1.35917600  |
| O | -0.80051200 | -2.23797900 | 4.03541700  |
| H | -0.65528700 | -2.13204000 | 4.98703400  |
| H | 0.03959200  | -2.65250800 | 3.67174200  |
| O | -2.60940500 | 1.48258600  | 2.95717400  |
| H | -2.46604900 | 1.72372800  | 2.01994900  |
| H | -3.04624900 | 0.60552000  | 2.93900100  |
| O | -3.10246100 | -1.31544800 | 2.93523500  |
| H | -2.36132600 | -1.78763100 | 3.38991300  |
| H | -3.86871700 | -1.90631800 | 2.95823700  |
| O | -2.84635500 | -2.34592600 | -1.47831500 |
| H | -1.86429300 | -2.39821000 | -1.57069600 |
| H | -3.05243400 | -1.74353300 | -2.22558900 |
| O | -2.28874900 | -0.63485900 | -3.54307700 |
| H | -2.61812100 | -0.25414100 | -4.36985600 |

|    |             |             |             |
|----|-------------|-------------|-------------|
| H  | -1.53731900 | -1.24085100 | -3.78788900 |
| O  | -2.23401700 | 3.30655000  | -1.90812400 |
| H  | -1.81430300 | 3.84659200  | -2.59455200 |
| H  | -1.96827500 | 3.74707000  | -1.05948000 |
| Gd | 0.17767100  | 0.04781600  | 0.28230200  |

E = -12776.596791 Hartree

Zero-point correction = 0.526044 Hartree/particle

Sum of electronic and thermal Energies = -12776.026084 Hartree

Sum of electronic and thermal Enthalpies = -12776.025140 Hartree

Sum of electronic and thermal Free Energies = -12776.147777 Hartree

**Table S38:** Cartesian coordinates (Å) of [Gd(peada)(H<sub>2</sub>O)<sub>2</sub>].4H<sub>2</sub>O complex, optimized at TPSSh/SARC-ZORA/6-31G(d,p), aqueous solution (0 Imaginary Frequency).

| Atoms | X           | Y           | Z           |
|-------|-------------|-------------|-------------|
| N     | -0.33356800 | -2.46543100 | 0.54037500  |
| N     | 2.43049500  | -1.38593300 | 0.05428800  |
| C     | 0.88237600  | -2.99301900 | 1.20227800  |
| C     | 2.11554200  | -2.80967300 | 0.32150700  |
| C     | -0.66241100 | -3.26204400 | -0.66842200 |
| C     | 3.19022900  | -0.76336800 | 1.16596500  |
| C     | -0.15659600 | -2.64175400 | -1.97968700 |
| C     | 2.30178500  | -0.03159500 | 2.18191400  |
| O     | 0.01969400  | -3.38447600 | -2.95824000 |
| O     | 2.84074900  | 0.60001200  | 3.11252000  |
| O     | 1.03282800  | -0.08147800 | 1.97348900  |
| O     | -0.00219000 | -1.35931700 | -1.96753200 |
| C     | 3.16900600  | -1.22683900 | -1.21899900 |
| C     | 3.08842400  | 0.23995100  | -1.65957200 |
| C     | -1.47639200 | -2.45904400 | 1.47852800  |
| O     | 4.12837500  | 0.84360900  | -2.01727600 |
| O     | 1.92289700  | 0.77132200  | -1.60333200 |
| C     | -2.64491300 | -1.71957600 | 0.86111600  |
| C     | -3.98083600 | -2.06263200 | 1.09995500  |
| C     | -4.99017600 | -1.29176200 | 0.51910000  |
| C     | -4.64185800 | -0.19506600 | -0.27180400 |
| C     | -3.28657900 | 0.07286100  | -0.46970900 |
| N     | -2.31781800 | -0.68224000 | 0.07378700  |
| H     | -6.03296900 | -1.54127200 | 0.68635200  |
| H     | -4.21972600 | -2.91686500 | 1.72464500  |
| H     | -5.38371400 | 0.45068200  | -0.72634000 |
| C     | -2.81496600 | 1.29533900  | -1.22871400 |
| O     | -3.65117100 | 2.17164100  | -1.53319700 |

|    |             |             |             |
|----|-------------|-------------|-------------|
| O  | -1.54471500 | 1.36738600  | -1.44491600 |
| H  | 1.00413200  | -2.46222500 | 2.14818100  |
| H  | 0.76750600  | -4.06699100 | 1.42162300  |
| H  | 2.97006800  | -3.31519900 | 0.79665400  |
| H  | 1.95186300  | -3.30229400 | -0.64111400 |
| H  | 4.21604600  | -1.54781100 | -1.13959800 |
| H  | 2.66676200  | -1.83186600 | -1.97938700 |
| H  | 3.81176500  | -1.50231500 | 1.69178800  |
| H  | 3.87666100  | -0.01820500 | 0.75125700  |
| H  | -1.77913100 | -3.47588800 | 1.76951400  |
| H  | -1.15903500 | -1.93428000 | 2.38762300  |
| O  | 1.06789300  | 2.63067600  | 0.24448600  |
| H  | 0.48723900  | 3.19973300  | -0.32990500 |
| H  | 1.98082100  | 2.75655200  | -0.13733800 |
| O  | -1.20167600 | 1.40502200  | 1.63172300  |
| H  | -0.52939300 | 1.83173500  | 2.22390800  |
| H  | -1.88015200 | 2.09397100  | 1.43177800  |
| H  | -1.75165100 | -3.32074800 | -0.76556000 |
| H  | -0.29568100 | -4.29222700 | -0.57668800 |
| O  | 3.54475400  | 3.18495000  | -0.75531100 |
| H  | 4.18614100  | 3.13266100  | -0.03114600 |
| H  | 3.77472000  | 2.41371200  | -1.33971200 |
| O  | 0.83195500  | 2.72068300  | 2.96998800  |
| H  | 1.43494600  | 1.97778800  | 3.19670400  |
| H  | 1.03907400  | 2.87645900  | 2.01693200  |
| O  | -3.20879000 | 3.26539900  | 1.07746300  |
| H  | -3.49047300 | 3.08382100  | 0.15640900  |
| H  | -3.95960600 | 2.97360700  | 1.61618500  |
| O  | -0.55090700 | 3.88393600  | -1.53462300 |
| H  | -1.03009500 | 3.02495800  | -1.66574400 |
| H  | -0.01596700 | 3.99072100  | -2.33567000 |
| Gd | 0.13694300  | 0.13208000  | -0.17114700 |

E = -12622.251105 Hartree

Zero-point correction = 0.457961 Hartree/particle

Sum of electronic and thermal Energies = -12621.754059 Hartree

Sum of electronic and thermal Enthalpies = -12621.753115 Hartree

Sum of electronic and thermal Free Energies = -12621.865748 Hartree

## References

1. M. Khannam, S. K. Sahoo and C. Mukherjee, *Eur. J. Inorg. Chem.*, 2019, **2019**, 2518–2523.
2. B. Phukan, C. Mukherjee and R. Varshney, *Dalton Trans.*, 2018, **47**, 135–142.
